# Supplementary material for: Optimisation of treatments for oral Neisseria gonorrhoeae infection: Pharmacokinetics Study (STI-PK project) – study protocol for non-randomised clinical trial
Source: PubMed Central journal article supplement — BMJ Open. 2022 Nov 11;12(11):e064782. doi: 10.1136/bmjopen-2022-064782 (PMC9660608; doi:10.1136/bmjopen-2022-064782), 2022-11-11
Supplement: bmjopen-2022-064782.draft_revisions.pdf [file bmjopen-2022-064782.draft_revisions.pdf]

# BMJ Open

BMJ Open is committed to open peer review. As part of this commitment we make the peer review history of every article we publish publicly available.

When an article is published we post the peer reviewers' comments and the authors' responses online. We also post the versions of the paper that were used during peer review. These are the versions that the peer review comments apply to.

The versions of the paper that follow are the versions that were submitted during the peer review process. They are not the versions of record or the final published versions. They should not be cited or distributed as the published version of this manuscript.

BMJ Open is an open access journal and the full, final, typeset and author-corrected version of record of the manuscript is available on our site with no access controls, subscription charges or pay-per-view fees (<http://bmjopen.bmj.com>).

If you have any questions on BMJ Open's open peer review process please email [info.bmjopen@bmj.com](mailto:info.bmjopen@bmj.com)

# BMJ Open

## Optimisation of treatments for oral *Neisseria gonorrhoeae* infection: Pharmacokinetics Study (STI-PK project) – Study protocol for non-randomised clinical trial

|                               |                                                                                                                                                                                                                                                                                                                                                                                                                                                                                                                                                                                                                                                                                                                                                                                                                                                                                                                                                                                                                                                                                                                                                                                                                                                                                                                                                                                                                                                                                                                                                                                                                                                                                                                                                                                                                                                                                                                                                                                                                                                |
|-------------------------------|------------------------------------------------------------------------------------------------------------------------------------------------------------------------------------------------------------------------------------------------------------------------------------------------------------------------------------------------------------------------------------------------------------------------------------------------------------------------------------------------------------------------------------------------------------------------------------------------------------------------------------------------------------------------------------------------------------------------------------------------------------------------------------------------------------------------------------------------------------------------------------------------------------------------------------------------------------------------------------------------------------------------------------------------------------------------------------------------------------------------------------------------------------------------------------------------------------------------------------------------------------------------------------------------------------------------------------------------------------------------------------------------------------------------------------------------------------------------------------------------------------------------------------------------------------------------------------------------------------------------------------------------------------------------------------------------------------------------------------------------------------------------------------------------------------------------------------------------------------------------------------------------------------------------------------------------------------------------------------------------------------------------------------------------|
| Journal:                      | <i>BMJ Open</i>                                                                                                                                                                                                                                                                                                                                                                                                                                                                                                                                                                                                                                                                                                                                                                                                                                                                                                                                                                                                                                                                                                                                                                                                                                                                                                                                                                                                                                                                                                                                                                                                                                                                                                                                                                                                                                                                                                                                                                                                                                |
| Manuscript ID                 | bmjopen-2022-064782                                                                                                                                                                                                                                                                                                                                                                                                                                                                                                                                                                                                                                                                                                                                                                                                                                                                                                                                                                                                                                                                                                                                                                                                                                                                                                                                                                                                                                                                                                                                                                                                                                                                                                                                                                                                                                                                                                                                                                                                                            |
| Article Type:                 | Protocol                                                                                                                                                                                                                                                                                                                                                                                                                                                                                                                                                                                                                                                                                                                                                                                                                                                                                                                                                                                                                                                                                                                                                                                                                                                                                                                                                                                                                                                                                                                                                                                                                                                                                                                                                                                                                                                                                                                                                                                                                                       |
| Date Submitted by the Author: | 14-May-2022                                                                                                                                                                                                                                                                                                                                                                                                                                                                                                                                                                                                                                                                                                                                                                                                                                                                                                                                                                                                                                                                                                                                                                                                                                                                                                                                                                                                                                                                                                                                                                                                                                                                                                                                                                                                                                                                                                                                                                                                                                    |
| Complete List of Authors:     | <p>Kong, Fabian; The University of Melbourne Centre for Epidemiology and Biostatistics, Melbourne School of Population and Global Health<br/> Unemo, Magnus; Örebro University, WHO Collaborating Centre for Gonorrhoea and Other STIs, National Reference Laboratory for Sexually Transmitted Infections, Department of Laboratory Medicine, Microbiology; University College London, Institute for Global Health<br/> Lim, Shueh; The University of Melbourne School of Population and Global Health, Centre for Epidemiology and Biostatistics<br/> Latch, Ngaire; The University of Melbourne School of Population and Global Health, Centre for Epidemiology and Biostatistics, Melbourne School of Population and Global Health<br/> Williamson, DA; The Peter Doherty Institute for Infection and Immunity, Department of Infectious Diseases; Walter and Eliza Hall Institute of Medical Research<br/> Roberts, Jason; The University of Queensland Centre for Clinical Research; Royal Brisbane and Women's Hospital, Departments of Pharmacy and Intensive Care Medicine<br/> Wallis, Steven C; The University of Queensland Centre for Clinical Research<br/> Parker, Suzanne; The University of Queensland Centre for Clinical Research<br/> Landersdorfer, Cornelia; Monash University Faculty of Pharmacy and Pharmaceutical Sciences<br/> Yap, Tami; The University of Melbourne, Melbourne Dental School<br/> Fairley, Christopher; Melbourne Sexual Health Centre, Alfred Health; Monash University Central Clinical School<br/> Chow, Eric; Monash University, Central Clinical School, Faculty of Medicine, Nursing and Health Sciences; Melbourne Sexual Health Centre, Alfred Health<br/> Lewis, David ; The University of Sydney Westmead Clinical School; Western Sydney Sexual Health Centre, Western Sydney Local Health District<br/> Hammoud, Mohamed ; UNSW, Kirby Institute<br/> Hocking, Jane; The University of Melbourne School of Population and Global Health, Centre for Epidemiology and Biostatistics</p> |
| Keywords:                     | INFECTIOUS DISEASES, CLINICAL PHARMACOLOGY, SEXUAL MEDICINE                                                                                                                                                                                                                                                                                                                                                                                                                                                                                                                                                                                                                                                                                                                                                                                                                                                                                                                                                                                                                                                                                                                                                                                                                                                                                                                                                                                                                                                                                                                                                                                                                                                                                                                                                                                                                                                                                                                                                                                    |
|                               |                                                                                                                                                                                                                                                                                                                                                                                                                                                                                                                                                                                                                                                                                                                                                                                                                                                                                                                                                                                                                                                                                                                                                                                                                                                                                                                                                                                                                                                                                                                                                                                                                                                                                                                                                                                                                                                                                                                                                                                                                                                |

1  
2  
3  
4  
5  
6  
7  
8  
9  
10  
11  
12  
13  
14  
15  
16  
17  
18  
19  
20  
21  
22  
23  
24  
25  
26  
27  
28  
29  
30  
31  
32  
33  
34  
35  
36  
37  
38  
39  
40  
41  
42  
43  
44  
45  
46  
47  
48  
49  
50  
51  
52  
53  
54  
55  
56  
57  
58  
59  
60

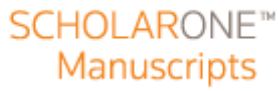

1  
2 Optimisation of treatments for oral *Neisseria gonorrhoeae* infection: Pharmacokinetics  
3 Study (STI-PK project) – Study protocol for non-randomised clinical trial

4 **Fabian YS Kong<sup>1</sup>, Magnus Unemo<sup>2,3</sup>, Shueh H Lim<sup>1,4</sup>, Ngaire Latch<sup>1</sup>, Deborah A Williamson<sup>5,6</sup>,**  
5 **Jason A Roberts<sup>7,8,9,10</sup>, Steven C Wallis<sup>7</sup>, Suzanne L Parker<sup>7</sup>, Cornelia B Landersdorfer<sup>11</sup>, Tami**  
6 **Yap<sup>12</sup>, Christopher K Fairley<sup>13,14</sup>, Eric PF Chow<sup>1,13,14</sup>, David A Lewis<sup>15,16</sup>, Mohamed A**  
7 **Hammoud<sup>17</sup>, Jane S Hocking<sup>1</sup>**  
8  
9

10 <sup>1</sup>Centre for Epidemiology and Biostatistics, Melbourne School of Population and Global  
11 Health, University of Melbourne, Victoria, Australia

12 <sup>2</sup>WHO Collaborating Centre for Gonorrhoea and Other STIs, National Reference Laboratory  
13 for Sexually Transmitted Infections, Department of Laboratory Medicine, Microbiology,  
14 Örebro University, Örebro, Sweden

15 <sup>3</sup>Institute for Global Health, University College London (UCL), London, United Kingdom

16 <sup>4</sup>The Crane General Practice, Clifton Hill, Victoria, Australia

17 <sup>5</sup>Department of Infectious Diseases, University of Melbourne at the Peter Doherty Institute  
18 for Infection and Immunity, University of Melbourne, Parkville, Victoria, Australia

19 <sup>6</sup>Walter and Eliza Hall Institute of Medical Research, Parkville, Victoria, Australia

20 <sup>7</sup>University of Queensland Centre for Clinical Research, Faculty of Medicine and University of  
21 Queensland, Brisbane, Queensland, Australia

22 <sup>8</sup>Herston Infectious Diseases Institute (HeIDI), Metro North Health, Brisbane, Australia

23 <sup>9</sup>Departments of Pharmacy and Intensive Care Medicine, Royal Brisbane and Women's  
24 Hospital, Brisbane, Australia

25 <sup>10</sup>Division of Anaesthesiology Critical Care Emergency and Pain Medicine, Nîmes University  
26 Hospital, University of Montpellier, Nîmes France

27 <sup>11</sup>Monash Institute of Pharmaceutical Sciences, Monash University, Parkville, Victoria,  
28 Australia

29 <sup>12</sup>Melbourne Dental School, The University of Melbourne, Victoria, Australia

30 <sup>13</sup>Melbourne Sexual Health Centre, Alfred Health, Melbourne, Victoria, Australia

31 <sup>14</sup>Central Clinical School, Faculty of Medicine, Nursing and Health Sciences, Monash  
32 University, Melbourne, Victoria, Australia

33 <sup>15</sup>Westmead Clinical School and Sydney Institute for Infectious Diseases, The University of  
34 Sydney, Sydney, New South Wales, Australia

35 <sup>16</sup>Western Sydney Sexual Health Centre, Western Sydney Local Health District, Parramatta,  
36 New South Wales, Australia

37 <sup>17</sup>Kirby Institute, University of NSW Sydney, New South Wales, Australia

#### 38 **Corresponding author:**

39 Dr Fabian Kong

40 Address: Melbourne School of Population and Global Health, University of Melbourne, 3/207  
41 Bouverie St, Melbourne, Australia 3004.

42 Tel: +61 3 9035 3039, Fax: + 61 3 9349 5815

43 Email: kongf@unimelb.edu.au

## Abstract

### Introduction:

*Neisseria gonorrhoeae* infections are common and incidence increasing. Oropharyngeal infections are associated with greater treatment failure compared to other sites and drive transmission to anogenital sites through saliva. Gonococcal resistance is increasing and new treatments are scarce, therefore clinicians must optimise currently available and emerging treatments in order to have efficacious therapeutic options. This requires pharmacokinetic data from the oral cavity/oropharynx, however availability of such information is currently limited.

### Methods and analysis:

Healthy male volunteers (participants) recruited into the study will receive single doses of either ceftriaxone 1g, cefixime 400mg or ceftriaxone 500mg plus 2g azithromycin. Participants will provide samples at 4-7 time points post-dose (treatment regimen dependent) from four oral sites, two oral fluids, one anorectal swab and blood. Participants will complete online questionnaires about their medical history, sexual practices and any side effects experienced up to day 5-7. Saliva/oral mucosal pH and oral microbiome analysis will be undertaken. Bioanalysis will be conducted by liquid chromatography-mass spectrometry. Drug concentrations over time will be used to develop mathematical models for optimisation of drug dosing regimens and to estimate pharmacodynamic targets of efficacy.

### Ethics and dissemination:

This study was approved by Royal Melbourne Hospital Human Research Ethics Committee (60370/MH-2021). The study results will be submitted for publication in peer-reviewed journals and reported at conferences. Summary results will be sent to participants requesting them. All data relevant to the study will be included in the article or uploaded as supplementary information.

Trial registration: Australian New Zealand Clinical Trial Registry - ACTRN12621000339853

**Key words:** *Neisseria gonorrhoeae*, pharmacokinetics, oropharyngeal, efficacy

## Strengths and limitations of this study

- This is the first comprehensive study to collect pharmacokinetic data of drugs used to treat gonorrhoea in the oral space from four oral sites, two oral fluids and blood. The data is complemented by data at the anorectal site for comparison.
- This data will inform optimisation of drugs to treat oropharyngeal gonorrhoea and develop methods to apply to drugs in phase 2 or 3 randomised controlled clinical trials.
- While we did not obtain true tissue samples (e.g. via biopsies) but rather swabs of surface mucosa, this will still allow examination of drug distribution by oral cell type, for an infection that is primarily at the epithelial surface.
- The study does not include women or those with oropharyngeal gonorrhoea infections.
- As we only include healthy volunteers, there is no data on bacterial minimum inhibitory concentrations to assess antimicrobial resistance and unable to generate pharmacodynamic data as there are no bacterial outcomes in the volunteers.

## INTRODUCTION

*Neisseria gonorrhoeae* (NG) is the second most common bacterial sexually transmitted infection (STI) globally.<sup>1</sup> Over the last ten years, NG infections have increased markedly – by 370% in Australia,<sup>2</sup> 75% in the USA,<sup>3</sup> and 250% in the UK.<sup>4</sup> Oropharyngeal NG is common with a prevalence of approximately 2%<sup>5</sup> and 5%<sup>5</sup> among heterosexuals and men who have sex with men (MSM) attending clinical services, respectively. Oropharyngeal infections are important because (i) cure rates at the oral site are up to 20% lower than at the genital site;<sup>6</sup> (ii) play a major role in transmission in the population through oral sex and use of saliva<sup>7</sup> and (iii) they are more likely to facilitate the development of antimicrobial resistance (AMR).<sup>8</sup> NG has now developed resistance to all classes of antibiotics recommended for gonorrhoea treatment<sup>9</sup> and in 2017, the World Health Organization (WHO) declared AMR NG as an urgent global threat.<sup>10</sup> Therefore, ensuring continued access to effective treatments remains a global challenge.

There is a scarcity of pharmacokinetic (PK) data for antibiotics in the oral cavity or oropharynx, and it remains unclear if lower oropharyngeal NG cure rates are due to inadequate tissue concentrations of antibiotics at the oral sites where NG grows. PK data for NG treatments in the oropharynx are currently only available for the tonsils.<sup>11</sup> However, it is not well understood where NG infects the oropharynx or oral cavity. Further, there are no PK data available for the mouth for emerging NG treatments currently in phase 2-3 randomized controlled clinical trials (RCTs). It is unlikely that any new STI drugs will reach the market in the near future<sup>12</sup> as the few drugs in current phase 2-3 trials are either producing estimates below the CDC efficacy criteria of 95%<sup>13</sup> for treating oral NG or have not been appropriately evaluated for oral infection. This does not provide much optimism unless drug therapy can be optimised by changing the dosing regimen. However, optimisation needs PK data at the site of infection, i.e. oral tissue.

We are conducting a non-randomised trial to generate comprehensive human PK data for oral NG treatments. These data can then be used to optimise available treatments and improve their efficacy to break the ongoing transmission and development of AMR. This paper describes the study methodologies for collecting PK data on currently recommended antimicrobial treatments for oropharyngeal NG (ceftriaxone 1g, cefixime 400mg and ceftriaxone 500mg plus 2g azithromycin) from human blood, four oral sites, and two oral fluids. Given the scarcity of PK data for the anorectum, we will also take the opportunity to measure antibiotic concentrations in the anorectum, although cure rates for anorectal NG are much higher compared to oral NG.

## RESEARCH AIM AND HYPOTHESIS

The primary aim of this study is to determine the PK properties of antibiotics to treat NG in the oral cavity (tongue, gingival crevicular fluid (GCF), saliva) and oropharynx – collectively referred to as “oral” in this protocol. Our secondary aims are to (a) determine pharmacodynamic (PD) targets at the oral site; (b) measure pH in the oral site; (c) assess the impact of the treatments on the oral microbiome; and (d) measure antibiotic concentrations in anorectal mucosal tissue. This study will specifically explore the PK of recommended oral NG treatments at the time of the study design, namely single doses of ceftriaxone 1g,<sup>14</sup>

1  
2 ceftriaxone 500mg plus 2g azithromycin<sup>15</sup> and cefixime 400mg.<sup>16 17</sup> These drugs have been  
3 selected for evaluation because they represent the main antibiotics likely to be used  
4 prospectively and amenable to optimisation.  
5

6 Our hypothesis is the PK properties of drugs vary by the site of infection resulting in  
7 differences in treatment efficacy, especially at non-urogenital sites such as at the oral and  
8 anorectal site. Therefore, different treatment regimens are needed for the optimal treatment  
9 of non-urogenital NG infections.  
10  
11

## 12 **OUTCOMES**

### 13 Primary outcome

14 Our primary outcome is to estimate PK data for each antibiotic, including: drug concentrations  
15 (total and protein unbound in blood and saliva)(C), peak concentrations (Cmax), time to reach  
16 Cmax (Tmax), area under the concentration-time curve (AUC - first 24 hours: AUC<sub>0-24</sub>; total:  
17 AUC<sub>0-∞</sub>), absorption rate constant (Ka), clearance (CL), volume of distribution (Vd), and half-  
18 life (T<sub>1/2</sub>). These data will be estimated in blood (venous or peripheral blood), tissue/mucosa  
19 (oral and anorectal), saliva and gingival crevicular fluid (GCF).  
20  
21  
22

### 23 Secondary outcomes

24 The magnitude of the PK/PD targets will be estimated by calculating (a) the percentage of  
25 time during which the protein unbound drug concentration exceeds the minimum inhibitory  
26 concentration (MIC) (%fT>MIC) for cephalosporins (b) the ratio of the area under the unbound  
27 drug concentration-time curve to the MIC (fAUC/MIC) for azithromycin and (c) the ratio of  
28 the maximum unbound drug concentration to the MIC (fCmax/MIC) for azithromycin.  
29  
30  
31

32 We will also measure the pH of the oral mucosa and saliva, saliva flow rate and oral  
33 microbiome changes. We will obtain PK data for each antibiotic in anorectal mucosa to  
34 compare to those at the oral sites.  
35

## 36 **METHODS AND ANALYSIS**

### 37 Study design and setting

38 This is a non-randomised, open label antibiotic trial among healthy volunteers. The trial will  
39 be conducted in an urban general practice in Victoria, Australia.  
40  
41  
42  
43

### 44 Duration of study

45 For those receiving monotherapy with ceftriaxone 1g or cefixime 400mg, the study requires  
46 three in-person visits (over 3 days) and for those receiving dual therapy with ceftriaxone  
47 500mg plus 2g azithromycin, five in-person visits (over 14 days) are required. Online self-  
48 administered questionnaires are completed during and after these visits. Recruitment  
49 commenced in April 2022 with anticipated completion by June 2023.  
50  
51

### 52 Participants

#### 53 Recruitment

54 Healthy men who self-report they are free of STIs will be recruited through advertising on  
55 social media (including Twitter and Facebook), University of Melbourne news emails, and  
56 word of mouth. Interested participants will be contacted by a member of the research team  
57 to discuss the study by telephone. Those eligible will be scheduled to attend the general  
58  
59  
60



1  
2 practice in person where written informed consent is obtained. Women will be excluded from  
3 the initial recruitment until after the preliminary results are obtained from men to permit  
4 refinement of sampling methods.  
5

#### 6 Inclusion and exclusion criteria

7 Men aged 18 years or older will be eligible if they have adequate comprehension to give  
8 informed consent, are able to attend all follow up visits, have an Australian Medicare card  
9 (Australia's national insurance scheme for healthcare) and have received at least 3 doses of  
10 COVID-19 vaccination. Those who have used antibiotics in the 4 weeks prior to the baseline  
11 visit, have widespread mucosal ulcerations by clinical examination, transgender people and  
12 people living with HIV with CD4 counts <250 cells/mm<sup>3</sup> will be excluded.  
13  
14

#### 15 Treatment and allocation

16 Three antibiotic regimens are being evaluated and include those recommended for treating  
17 oropharyngeal NG at the time of the study in Australia or internationally i.e. (a) ceftriaxone  
18 1g<sup>14</sup> (Ceftriaxone-AFT, China) reconstituted in 1% lignocaine (Pfizer, Australia) as a single dose  
19 by intramuscular injection (b) ceftriaxone 500mg reconstituted in 1% lignocaine as a single  
20 dose by intramuscular injection plus 2g oral azithromycin (1g followed by 1g 6-12 hours  
21 later)<sup>18</sup> (Sandoz, Australia) or (c) oral cefixime 400mg<sup>17</sup> as single dose (Devar, Spain).  
22  
23

24 Treatments will not be randomly allocated, rather they will be allocated in batches until the  
25 required sample size is obtained for each regimen, with the first treatment investigated being  
26 ceftriaxone 1g.  
27  
28

#### 29 Reimbursement

30 Each participant will be reimbursed a maximum of AUD1000 for reasonable time and  
31 expenses (food and transport) - AUD500 at the conclusion of the baseline visit and a further  
32 AUD500 at the conclusion of the final in-person visit.  
33  
34

#### 35 Specimen collection and measurements

36 For each participant, antibiotic concentrations will be measured from four oral sites, two oral  
37 fluids and blood. An anorectal swab will also be collected.  
38

39 Specimen collection from participants is summarised below and in Table 1.  
40  
41

42 Oral swabs/curettes specimen collection for PK and PD analysis: (a) tonsils (tonsil and  
43 posterior tonsillar pillar) by swiping both areas three times with a FloqSwab (552c; Copan,  
44 France), (b) from the posterior pharyngeal wall by swiping the site six times with FloqSwab,  
45 and (c) 15 swipes of (i) the buccal mucosa of each cheek and (ii) lateral sides of tongue using  
46 a dermal curette (4mm; Kai Medical, Japan).  
47  
48

49 Oral fluids specimen collection for PK and PD analysis: All participants are asked to rest their  
50 mouth (no eating, drinking, chewing, smoking etc.) for a minimum of 30 minutes prior to the  
51 collection of saliva and GCF. 1mL of saliva will be collected by dribbling into a cup. GCF will be  
52 collected by placing two PerioCol strips (Oralflow, USA) at the central or lateral incisors and  
53 leaving in place for one minute.  
54  
55

56 Blood collection for PK and PD analysis: (a) 5ml of blood will be collected via venepuncture  
57 and plasma obtained by centrifugation at 3500rpm (2500 x g) for 15min (BD Vacutainer 102IU  
58  
59  
60

1  
2 lithium heparin, ref. 367885), (b) 10µL of finger prick blood will be collected using volumetric  
3 absorptive microsampling (VAMS; Neoteryx Mitra) in duplicate, (c) 10mL of whole blood to  
4 measure baseline blood biochemistry for analysis of renal and liver function (BD Vacutainer  
5 171IU lithium heparin, ref. 367375) and haematocrit (BD Vacutainer 5.4mg EDTA, ref. 367838)  
6 to be used in PK optimisation estimations.  
7  
8

9  
10 *Specimen collection to evaluate oral microbiome:*

11 Sample will be collected by swabbing the posterior oropharynx, it's side walls and tonsillar  
12 crypts with a total of six swipes using an Eswab (Copan, France).  
13

14 *Anorectal swab*

15 Anorectal swab will be self-collected by inserting a FloqSwab 5cm into anorectum and  
16 rotating gently for 5 seconds.  
17

18  
19 Collected samples and pH measurements will be taken before (baseline), 2, 4, 6, 24 and 48  
20 hours after the antibiotic dose. For the ceftriaxone 500mg plus 2g azithromycin arm, the first  
21 post-dose sample will be taken after the ceftriaxone and first 1g dose of azithromycin. For  
22 ceftriaxone and azithromycin dual therapy, additional samples will be taken at day 7 and 14  
23 days post-dose due to the long half-life of azithromycin (Table 1).  
24  
25

26 *Patient and Public Involvement*

27 No patient involved. Summary results will be sent to participants who consent to receiving  
28 them.  
29  
30  
31  
32  
33  
34  
35  
36  
37  
38  
39  
40  
41  
42  
43  
44  
45  
46  
47  
48  
49  
50  
51  
52  
53  
54  
55  
56  
57  
58  
59  
60

Table 1 – Summary of sampling frame

| Site      | Sample type<br>(In order of<br>sample<br>collection) | Screening<br>for<br>eligibility | 0h<br>(Baseline,<br>before dose) | Sampling times (post dose) |    |    |    |    |      |     |      |   |
|-----------|------------------------------------------------------|---------------------------------|----------------------------------|----------------------------|----|----|----|----|------|-----|------|---|
|           |                                                      |                                 |                                  | 1-2h                       | 4h | 6h | d1 | d2 | d3-5 | d7* | d14* |   |
|           | Informed consent                                     | X                               |                                  |                            |    |    |    |    |      |     |      |   |
|           | Baseline survey                                      |                                 |                                  | X                          |    |    |    |    |      |     |      |   |
|           | Follow up surveys                                    |                                 |                                  |                            |    | X  | X  | X  | X    | X   | X    | X |
| Oral      | Saliva flow rate                                     |                                 | X                                |                            |    |    |    |    |      |     |      |   |
|           | Saliva – pH                                          |                                 | X                                | X                          | X  | X  | X  | X  |      |     | X    | X |
|           | pH of buccal mucosa and tongue                       |                                 | X                                | X                          | X  | X  | X  | X  |      |     | X    | X |
|           | Saliva – drug                                        |                                 | X                                | X                          | X  | X  | X  | X  |      |     | X    | X |
|           | GCF                                                  |                                 | X                                | X                          | X  | X  | X  | X  |      |     | X    | X |
|           | Oral swabs (4 sites)                                 |                                 | X                                | X                          | X  | X  | X  | X  |      |     | X    | X |
|           | Microbiome                                           |                                 | X                                | X                          | X  | X  | X  | X  |      |     | X    | X |
| Bloods    | VAMS                                                 |                                 | X                                | X                          | X  | X  | X  | X  |      |     | X    | X |
|           | Blood – Full blood count and biochemistry, LFT       |                                 | X                                |                            |    |    |    |    |      |     |      |   |
|           | Blood for plasma and whole blood for VAMS            |                                 | X                                | X                          | X  | X  | X  | X  |      |     | X    | X |
| Anorectum | Swab for drug level                                  |                                 | X                                | X                          | X  | X  | X  | X  |      |     | X    | X |

GCF= gingival crevicular fluid; VAMS=volumetric absorptive microsampling; LFT=liver function test

\*day 7 and 14 for ceftriaxone 500mg plus 2g azithromycin arm only

### Participant data

Men's demographics, weight, medical history (smoking status, malabsorption conditions, concurrent medications, STIs and meningococcal vaccination status in the past year), sexual practices, recreational drug use and oral health will be recorded at recruitment. During the follow-up period, men will be asked if they had oral or anal sex prior to each in-person visit and any antibiotic side effects (nausea, vomiting or diarrhoea).

### Adverse events reporting

We do not expect any severe adverse events as these drugs have been widely used for decades and their side-effect profiles are well-established. Daily mobile SMS will be sent to each participant to collect any nausea, vomiting or diarrhoea for 5 days post-dose for all antibiotics, except for participants on ceftriaxone with azithromycin who will receive SMS for 7 days due to the longer half-life of azithromycin.

Study survey data will be collected and managed using REDCap electronic data capture tools hosted at The University of Melbourne.

## ANALYSIS

### Laboratory analysis

#### Specimen analysis

All oral swabs/curettes and PerioCol strips will be placed in 2mL tubes containing 0.5-1mL 100% methanol and stored immediately at -20°C until delivery to the laboratory where they will be stored at -80°C until analysis. Saliva and VAMS will be stored neat in 2mL tubes. Drug concentrations will be estimated using liquid chromatography-mass spectrometry performed to industry standard with pre-established batch acceptance criteria applied to ensure the reliability of the resulting data.<sup>19</sup> Protein unbound (“free”) drug will be measured in plasma and assumed from saliva as only free drug distributes into saliva.

#### pH measurements

The pH of saliva and oral mucosa will be measured as studies have reported increases in some antimicrobial MICs with lowering pH and pH affects the degree of drug ionisation and penetration into cells.<sup>11</sup> All participants will be asked to rest their mouth for at least 30 minutes prior to saliva and oral mucosal pH measurements.

Saliva pH will be measured by a drop of saliva into the Lacquatwin pH meter (pH22, Horiba, USA). The surface pH of the side of the tongue and buccal mucosa will be measured by placing a Hanna flat head meter (HI99171; USA) against the oral mucosal surface as per previous methods.<sup>20</sup>

Specimens collected for saliva flow rate: At baseline, after resting the mouth for at least 30 minutes, saliva will be collected into a cup over 1 minute and then the volume collected measured (mL/min).

#### Sample size estimation

We have used optimal sampling design (OSD) methodologies using published PK data to determine the number of subjects and the number and timing of samples needed for each drug to provide sufficiently precise estimates of the PK model parameters. Our calculations were based on the number needed for measuring PK in blood samples because there are no published data available for tissue samples at our infection sites. Using OSD methods and taking into consideration recruitment challenges due to the requirement for intensive sampling among healthy volunteers and COVID-19 restrictions, up to 20 people per drug is considered sufficient and in line with previous PK studies in the mouth.<sup>21</sup>

#### Pharmacokinetic analysis

Nonlinear mixed-effects modelling will be performed using the FOCE+I algorithm in the NONMEM software. For each drug the plasma concentration-time profiles will be modelled first. One-, two- and three-compartment models will be evaluated, with linear, saturable or mixed-order elimination. To describe absorption, first- and zero-order, simultaneous or sequential first- and zero-order processes will be tested. Profiles in saliva and oral swabs/curettes will be subsequently included. An MC-PEM algorithm, minimal physiologically-based PK modelling approach<sup>22</sup> and/or three-stage hierarchical Bayesian method may be considered as needed.<sup>23</sup> Inter-individual variability for the population PK parameters will be estimated where possible. Individual (posthoc) PK parameter estimates will be graphed against biological subject characteristics (e.g. weight, creatinine clearance)

1  
2 for initial exploration of potential covariate relationships. Covariates will be formally  
3 evaluated by forward inclusion followed by backwards elimination. Model selection will be  
4 based on goodness-of-fit plots, visual predictive checks, the normalised prediction  
5 distribution error, the log-likelihood ratio test (for nested models; Akaike information  
6 criterion for non-nested models) and biological plausibility. For each drug, the C<sub>max</sub>, T<sub>max</sub>,  
7 elimination half-lives and AUC (AUC<sub>0-24</sub>, AUC<sub>0-∞</sub>) will be calculated from the individual  
8 estimated PK parameters or read from the individual fitted PK profiles. For the PK/PD indices,  
9 the magnitude of %fT>MIC will be estimated for ceftriaxone and cefixime. The magnitudes of  
10 fAUC/MIC and fC<sub>max</sub>/MIC will be estimated for azithromycin. The NG MICs used for PK/PD  
11 target attainment of ceftriaxone and cefixime will be 0.002, 0.004, 0.008, 0.015, 0.03, 0.06,  
12 0.125, 0.25, 0.5, 1.0 and 2.0mg/L. NG MICs used for azithromycin will be 0.125, 0.25, 0.5, 1.0,  
13 2.0, 4.0 and 8.0 mg/L.  
14  
15  
16  
17

### 18 Microbiome analysis

19 Microbiome analysis will be used to understand the impact of antibiotics on oral microbiota  
20 and to examine any associations with drug concentrations since human gut biota has been  
21 shown to modulate the efficacy of drugs.<sup>24</sup>

22 Microbiome analysis will be undertaken as previously described.<sup>25</sup> DNA will be extracted from  
23 tonsillar samples using the QIASymphony PowerFecal Pro kit (Qiagen). Extracted DNA will be  
24 used to generate an amplicon-based library using primers that amplify the V4 region of the  
25 16S rRNA gene: 515F (59-GTGYCAGCMGCCGCGGTAA-39) and 806R (59-  
26 GGACTACNVGGGTWTCTAAT-39). Libraries (biological samples, as well as positive and  
27 negative controls) will be sequenced on an Illumina MiSeq instrument (Illumina, San Diego,  
28 CA, USA) with a 2 by 150 bp run through Doherty Applied Microbial Genomics at The Peter  
29 Doherty Institute for Infection and Immunity, University of Melbourne.  
30  
31  
32  
33

34 Demultiplexing and trimming of sequencing reads will be conducted using the online tool  
35 Qiita (<https://qiita.ucsd.edu>). Reads will be demultiplexed using split libraries FASTQ and  
36 trimmed to 150 bp (Version QIIMEq2 1.9.1). DADA2 v1.16.0 will be used to quality-filter the  
37 sequence data, infer amplicon sequence variants (ASVs), and remove chimeras. DADA2 and a  
38 DADA2 formatted version of the Silva reference database (v138) will be used to assign  
39 taxonomy down to the genus level. We will visually compare the oropharyngeal microbiota  
40 composition at weeks 0, 1 and 2 by principal component analysis (PCA) of center-log ratio-  
41 transformed ASV level sequence data, using mixOmics (v6.12.1). PERMANOVA based on the  
42 Bray-Curtis distance will be used to test for differences in the overall structure of the  
43 oropharyngeal microbiota. Bacterial diversity will be calculated on ASV data using the  
44 Shannon diversity index using vegan v2.5-7. Changes in bacterial diversity following treatment  
45 will be used to assess using the Wilcoxon signed-rank test. We will investigate differences in  
46 the baseline oropharyngeal microbiota composition between individuals with and without  
47 specific characteristics/factors.  
48  
49  
50  
51

### 52 **ETHICS AND DISSEMINATION**

#### 53 Ethics approval

54 This study was approved by Royal Melbourne Hospital Human Research Ethics Committee  
55 (60370/MH-2021). The study is based on voluntary participation and a written informed  
56 consent process.  
57  
58  
59  
60

1  
2 Clinical trial registration: The study is registered with the Australian drug regulator, The Therapeutic  
3 Goods Administration (Clinical Trial Notification CT20006 CT-2021-CTN-00571-1 V2) and with the  
4 Australian New Zealand Clinical Trials Registry (Trial ID ACTRN12621000339853)  
5

#### 6 Dissemination plans

7  
8 The study results will be submitted for publication in peer-reviewed journals and reported at  
9 national and international conferences. These data will be used to inform other drug  
10 optimisation studies or modelling to prevent NG AMR. Summary results will be sent to  
11 participants who consent to receiving them. All data relevant to the study will be included in  
12 the article or uploaded as supplementary information.  
13  
14

#### 15 **DISCUSSION**

16 Treatment options for gonorrhoea are diminishing as NG becomes increasingly resistant –  
17 particularly at the oropharyngeal site. The primary objectives of STI treatment are to  
18 maximize cure, minimize drug toxicity and avoid induction or selection of AMR. Knowledge of  
19 the PK characteristics of drugs can guide development of treatment regimens. Simply  
20 measuring the concentrations in tissue and blood as is done in most trials of new NG  
21 treatment, is not enough. This trial will generate the most comprehensive PK data available  
22 today from four oral sites, two oral fluids and blood. It will also estimate PK/PD target  
23 achievements based on the PK data and model. It will do this by using new and validated  
24 methods including the use of blood VAMS, which will allow bloods to be taken in the home  
25 setting. The data and methods will inform optimisation of drugs in phase 2 or 3 RCTs and  
26 Hollow Fibre Infection Models.<sup>26 27</sup>  
27  
28  
29  
30

31 Oropharyngeal NG is a major driver of ongoing transmission, contributing to 50% of new NG  
32 infections in the anorectum through saliva in some settings<sup>28</sup> and it can cause serious  
33 reproductive sequelae (e.g.: pelvic inflammatory disease) by being passed to female genitalia  
34 via oral sex.<sup>29</sup> As concerns for global AMR increases with few antimicrobials for STIs in  
35 development,<sup>30</sup> clinicians have little choice but to maximize the use of currently available  
36 treatments. One approach is to optimise currently available antibiotics, but this requires an  
37 understanding of the PK of these drugs in the target population, including their distribution  
38 to the site of infection. Only drug that is unbound to protein (“free” drug) is pharmacologically  
39 active so measuring this is critical.  
40  
41  
42  
43

44 Even though a drug reaches adequate concentrations in tissue, this does not always translate  
45 to clinical efficacy,<sup>31</sup> because the drug needs to be in a suitable form (i.e. unionized rather  
46 than ionized form) to penetrate across cell walls to kill the bacteria – and this is directly  
47 affected by the environmental pH. Our trial will provide the first comprehensive pH data for  
48 the mouth and effects on drug PK. Lower pHs have been shown to increase the MIC for some  
49 drugs used to treat STIs.<sup>32</sup> In the first and only rectal azithromycin PK study, we also found  
50 that raising the gut pH by taking an acid lowering drug (esomeprazole) was associated with at  
51 least a 10-fold higher azithromycin tissue concentrations compared with those not taking this  
52 drug.<sup>33</sup> This is a highly relevant finding, as a previous study suggested higher azithromycin  
53 concentrations may be needed in anorectal tissue, as there was a 4-fold higher MIC for  
54 *Chlamydia trachomatis* in anorectal compared to vaginal tissue.<sup>34</sup> Similarly, the MICs of  
55 azithromycin and ceftriaxone in NG isolates cultured from oropharynx were 1.6-1.8 times  
56 higher than in the NG isolates obtained from the urogenital tract.<sup>35</sup>  
57  
58  
59  
60

1  
2 Applying PK data to predict an antibiotic's effectiveness i.e. its PD, varies between different  
3 classes of antibiotics and remains unclear at the oropharyngeal site. For some, the  $fT > MIC$  is  
4 considered to be more important (e.g. for beta-lactams including cephalosporins), while for  
5 other antibiotics (e.g. macrolides) the overall drug exposure (AUC) relative to MIC ( $fAUC/MIC$   
6 ratio) is considered more predictive.<sup>36</sup> One recommendation about using PK/PD indices for  
7 predicting outcome has been published from the US Centers for Disease Control and  
8 Prevention who states that for effective NG treatment, the serum concentration should be  
9 at least 4x the MIC, for at least 10 hours after reaching its peak concentration.<sup>37</sup> However this  
10 is based on data from 1964 using penicillin to treat urethral NG<sup>38</sup> and is therefore of limited  
11 applicability to non-penicillin treatments or infections at non-urogenital sites. For the oral  
12 space, available PK data are limited to small studies in tonsils and saliva. In addition to saliva,  
13 drug concentrations in GCF may play a role in efficacy. GCF plays a role in the progression of  
14 inflammatory oral diseases<sup>39</sup> which may impact oral infections and antibiotics such as  
15 azithromycin have been shown to reduce GCF volume.<sup>40</sup> Limited PK data in the oropharynx or  
16 oral cavity has major limitations since we do not yet know where NG replicates in the oral  
17 space and therefore where antibiotics need to be delivered to kill NG. Therefore,  
18 understanding if an antibiotic distributes widely in oral tissue is critical.  
19  
20  
21  
22  
23  
24  
25

26 This trial does have some limitations that must be considered when interpreting the results.  
27 Our sample is limited to males with transgender and females excluded. Additionally, because  
28 of trial logistics, we had to exclude those with oropharyngeal gonorrhoea and because of this,  
29 we are unable to generate PD data as there are no bacterial outcomes in the volunteers.  
30 Additionally, we do not have true tissue samples (e.g. from biopsies) but rather swabs of  
31 surface mucosa, this will still allow examination of drug distribution by oral cell type, for an  
32 infection that is primarily at the epithelial surface.  
33  
34  
35

36 In conclusion, comprehensive PK data on treatments to cure oropharyngeal NG are essential  
37 if we are to maintain their effectiveness through drug optimisation when few new drugs will  
38 reach the market in the near future. Equally, methods to collect and analyse antibiotic  
39 concentrations in oral mucosal surfaces, tissue and fluids are essential to be able to apply  
40 these methods to emerging treatment in pre-marketing trials to ensure drugs in the pipeline  
41 will be effective at both oropharyngeal and anogenital sites.  
42  
43  
44

45 **Acknowledgments:** Not applicable  
46  
47

48 **Contributors** FSYK: conceptualised and designed the study. All authors participated in study  
49 design. FYSK and JSH: wrote the first draft of the study protocol. All authors: made revision  
50 on the draft. All authors reviewed and approved the final manuscript.  
51  
52

53 **Funding:** This project is funded by the Australian National Health and Medical Research  
54 Council (NHMRC grant number APP1181057). J.A. Roberts received funding from the NHMRC  
55 for a Centre of Research Excellence (APP2007007) and an Investigator Grant (APP2009736) as  
56 well as an Advancing Queensland Clinical Fellowship. EPFC is supported by an NHMRC  
57 Emerging Leadership Investigator Grant (GNT1172873).  
58  
59

60 **Competing interests:** The authors declare that they have no competing interests.

1  
2 **Patient consent for publication:** Not applicable.  
3

#### 4 **References**

- 5
- 6 1. World Health Organisation. Global progress report on HIV, viral hepatitis and sexually transmitted
- 7 infections, 2021. Accountability for the global health sector strategies 2016–2021: actions
- 8 for impact., 2021.
- 9
- 10 2. National Notifiable Diseases Surveillance System. Number of notifications of Gonococcal
- 11 infections, Australia, by age group and sex. 2021.
- 12
- 13 3. Centers for Disease Control and Prevention. Sexually Transmitted Disease Surveillance 2017
- 14 report. In: Atlanta: U.S : Department of Health and Human Services, ed., 2017.
- 15
- 16 4. Public Health England (PHE). Sexually transmitted infections and screening for chlamydia in
- 17 England, 2018. 2019;13(19)
- 18
- 19 5. Chan PA, Robinette A, Montgomery M, et al. Extragenital Infections Caused by Chlamydia
- 20 trachomatis and Neisseria gonorrhoeae: A Review of the Literature. *Infect Dis Obstet*
- 21 *Gynecol* 2016;2016:5758387. doi: 10.1155/2016/5758387
- 22
- 23 6. Moran JS. Treating Uncomplicated Neisseria gonorrhoeae Infections: Is the Anatomic Site of
- 24 Infection Important? *Sex Transm Dis* 1995;22(1):39-47. doi: 10.1097/00007435-199501000-
- 25 00007
- 26
- 27 7. Fairley CK, Cornelisse VJ, Hocking JS, et al. Models of gonorrhoea transmission from the mouth
- 28 and saliva. *Lancet Infect Dis* 2019;19(10):360-66. doi: 10.1016/s1473-3099(19)30304-4
- 29
- 30 8. Unemo M, Shafer WM. Antimicrobial resistance in Neisseria gonorrhoeae in the 21st century:
- 31 past, evolution, and future. *Clin Microbiol Rev* 2014;27(3):587-613. doi:
- 32 10.1128/CMR.00010-14 [published Online First: 2014/07/02]
- 33
- 34 9. Unemo M, Lahra MM, Escher M, et al. WHO global antimicrobial resistance surveillance for
- 35 Neisseria gonorrhoeae 2017–18: a retrospective observational study. *The Lancet Microbe*
- 36 2021;2(11):e627-e36. doi: 10.1016/s2666-5247(21)00171-3
- 37
- 38 10. World Health Organisation. Global Priority List of Antibiotic-Resistant Bacteria to Guide Research,
- 39 Discovery, and Development of New Antibiotics. : WHO; Geneva, Switzerland, 2017.
- 40
- 41 11. Kong FYS, Horner P, Unemo M, et al. Pharmacokinetic considerations regarding the treatment of
- 42 bacterial sexually transmitted infections with azithromycin: a review. *J Antimicrob*
- 43 *Chemother* 2019;74(5):1157-66. doi: 10.1093/jac/dky548
- 44
- 45 12. Alirol E, Wi TE, Bala M, et al. Multidrug-resistant gonorrhoea: A research and development
- 46 roadmap to discover new medicines. *PLOS Medicine* 2017;14(7):e1002366. doi:
- 47 10.1371/journal.pmed.1002366
- 48
- 49 13. Kong FYS, Hatzis CL, Lau A, et al. Treatment efficacy for pharyngeal Neisseria gonorrhoeae: a
- 50 systematic review and meta-analysis of randomized controlled trials. *J Antimicrob*
- 51 *Chemother* 2020;75(11):3109-19. doi: 10.1093/jac/dkaa300
- 52
- 53 14. Fifer H, Saunders J, Soni S, et al. 2018 UK national guideline for the management of infection
- 54 with Neisseria gonorrhoeae. *Int J STD AIDS* 2020;31(1):4-15. doi:
- 55 10.1177/0956462419886775 [published Online First: 2019/12/25]
- 56
- 57 15. Australian Sexual Health Alliance. Australian STI management guidelines for use in primary care
- 58 2021
- 59
- 60 16. Workowski KA, Bolan GA. Sexually Transmitted Diseases Treatment Guidelines, 2015. *MMWR*
- Recomm Rep* 2015;64(RR-03):1-138.
17. World Health Organisation. WHO guidelines for the treatment of Neisseria gonorrhoeae, 2016.
18. Unemo M, Ross J, Serwin AB, et al. 2020 European guideline for the diagnosis and treatment of
- gonorrhoea in adults. *Int J STD AIDS* 2020:956462420949126. doi:
- 10.1177/0956462420949126
19. Naicker S, Guerra Valero YC, Ordenez Meija JL, et al. A UHPLC-MS/MS method for the
- simultaneous determination of piperacillin and tazobactam in plasma (total and unbound),
- urine and renal replacement therapy effluent. *J Pharm Biomed Anal* 2018;148:324-33. doi:
- 10.1016/j.jpba.2017.10.023



20. Yosipovitch G, Kaplan I, Calderon S, et al. Distribution of Mucosal pH on the Bucca, Tongue, Lips and Palate. Study in Healthy Volunteers and Patients with Lichen Planus, Behçet's Disease and Burning Mouth Syndrome. *Acta dermato-venereologica* 2001;81(3):178-80. doi: 10.1080/000155501750376258
21. Barbee LA, Nayak SU, Blumer JL, et al. A Phase 1 Pharmacokinetic and Safety Study of Extended-Duration, High-dose Cefixime for Cephalosporin-resistant *Neisseria gonorrhoeae* in the Pharynx. *Sex Transm Dis* 2018;45(10):677-83. doi: 10.1097/OLQ.0000000000000844
22. Cao Y, Jusko WJ. Applications of minimal physiologically-based pharmacokinetic models. *J Pharmacokinet Pharmacodyn* 2012;39(6):711-23. doi: 10.1007/s10928-012-9280-2
23. Landersdorfer CB, Bulitta JB, Kinzig M, et al. Penetration of antibacterials into bone: Pharmacokinetic, pharmacodynamic and bioanalytical considerations. *Clin Pharmacokinet* 2009;48(2):89-124. doi: 10.2165/00003088-200948020-00002
24. Klunemann M, Andrejev S, Blasche S, et al. Bioaccumulation of therapeutic drugs by human gut bacteria. *Nature* 2021;597(7877):533-38. doi: 10.1038/s41586-021-03891-8
25. Plummer EL, Maddaford K, Murray GL, et al. The Impact of Mouthwash on the Oropharyngeal Microbiota of Men Who Have Sex with Men: a Substudy of the OMEGA Trial. *Microbiology spectrum* 2022;10(1):e01757-21. doi: <https://doi.org/10.1128/spectrum.01757-2>
26. Jacobsson S, Golparian D, Oxelbark J, et al. Pharmacodynamic Evaluation of Dosing, Bacterial Kill, and Resistance Suppression for Zoliflodacin Against *Neisseria gonorrhoeae* in a Dynamic Hollow Fiber Infection Model. *Front Pharmacol* 2021;12:682135. doi: 10.3389/fphar.2021.682135
27. Jacobsson S, Golparian D, Oxelbark J, et al. Pharmacodynamic Evaluation of Zoliflodacin Treatment of *Neisseria gonorrhoeae* Strains With Amino Acid Substitutions in the Zoliflodacin Target GyrB Using a Dynamic Hollow Fiber Infection Model. *Front Pharmacol* 2022;13:874176. doi: 10.3389/fphar.2022.874176
28. Chow EPF, Cornelisse VJ, Read TRH, et al. Saliva use as a lubricant for anal sex is a risk factor for rectal gonorrhoea among men who have sex with men, a new public health message: a cross-sectional survey. *Sex Transm Infect* 2016;92:532-36. doi: 10.1136/sextrans-2015-052502
29. Lau A, Kong FYS, Huston W, et al. Factors associated with anorectal *Chlamydia trachomatis* or *Neisseria gonorrhoeae* test positivity in women – a systematic review and meta-analysis. *Sex Transm Infect.* 2019 Aug;95(5):361-367. doi: 10.1136/sextrans-2018-05395
30. World Health Organisation. Antimicrobial resistance: global report on surveillance, 2014.
31. Mouton JW, Theuretzbacher U, Craig WA, et al. Tissue concentrations: do we ever learn? *J Antimicrob Chemother* 2008;61(2):235-37. doi: 10.1093/jac/dkm476
32. Barcia-Macay M, Seral C, Mingeot-Leclercq MP, et al. Pharmacodynamic evaluation of the intracellular activities of antibiotics against *Staphylococcus aureus* in a model of THP-1 macrophages. *Antimicrob Agents Chemother* 2006;50(3):841-51. doi: 10.1128/AAC.50.3.841-851.2006
33. Kong FYS, Rupasinghe TW, Simpson JA, et al. Pharmacokinetics of a single 1g dose of azithromycin in rectal tissue in men. *Plos One* 2017;12(3):e0174372. doi: 10.1371/journal.pone.0174372
34. Foschi C, Salvo M, Cevenini R, et al. *Chlamydia trachomatis* antimicrobial susceptibility in colorectal and endocervical cells. *J Antimicrob Chemother* 2018;73(2):409-13. doi: 10.1093/jac/dkx392
35. Cole MJ, Tan W, Fifer H, et al. Gentamicin, azithromycin and ceftriaxone in the treatment of gonorrhoea: the relationship between antibiotic MIC and clinical outcome. *J Antimicrob Chemother* 2019;75(2):449-57. doi: 10.1093/jac/dkz436
36. Ambrose PG, Bhavnani SM, Rubino CM, et al. Pharmacokinetics-Pharmacodynamics of Antimicrobial Therapy: It's Not Just for Mice Anymore. *Clin Infect Dis* 2007;44(1):79-86. doi: 10.1086/510079
37. Newman LM, Moran JS, Workowski KA. Update on the Management of Gonorrhoea in Adults in the United States. *Clin Infect Dis* 2007;44(Supplement\_3):S84-S101. doi: 10.1086/511422

- 1  
2 38. Jaffe HW, Schroeter AL, Reynolds GH, et al. Pharmacokinetic determinants of penicillin cure of  
3 gonococcal urethritis. *Antimicrob Agents Chemother* 1979;15(4):587-91. doi:  
4 10.1128/AAC.15.4.58  
5 39. Subbarao KC, Nattuthurai GS, Sundararajan SK, et al. Gingival Crevicular Fluid: An Overview. *J*  
6 *Pharm Bioallied Sci* 2019;11(Suppl 2):S135-S39. doi: 10.4103/JPBS.JPBS\_56\_19  
7 40. Ho W, Eubank T, Leblebicioglu B, et al. Azithromycin decreases crevicular fluid volume and  
8 mediator content. *J Dent Res* 2010;89(8):831-5. doi: 10.1177/0022034510368650  
9

10  
11  
12  
13  
14  
15  
16  
17  
18  
19  
20  
21  
22  
23  
24  
25  
26  
27  
28  
29  
30  
31  
32  
33  
34  
35  
36  
37  
38  
39  
40  
41  
42  
43  
44  
45  
46  
47  
48  
49  
50  
51  
52  
53  
54  
55  
56  
57  
58  
59  
60

For peer review only

# Reporting checklist for protocol of a clinical trial.

Based on the SPIRIT guidelines.

## Instructions to authors

Complete this checklist by entering the page numbers from your manuscript where readers will find each of the items listed below.

Your article may not currently address all the items on the checklist. Please modify your text to include the missing information. If you are certain that an item does not apply, please write "n/a" and provide a short explanation.

Upload your completed checklist as an extra file when you submit to a journal.

In your methods section, say that you used the SPIRIT reporting guidelines, and cite them as:

Chan A-W, Tetzlaff JM, Gøtzsche PC, Altman DG, Mann H, Berlin J, Dickersin K, Hróbjartsson A, Schulz KF, Parulekar WR, Krleža-Jerić K, Laupacis A, Moher D. SPIRIT 2013 Explanation and Elaboration: Guidance for protocols of clinical trials. *BMJ*. 2013;346:e7586

|                                   | Reporting Item                                                                                                                  | Page Number |
|-----------------------------------|---------------------------------------------------------------------------------------------------------------------------------|-------------|
| <b>Administrative information</b> |                                                                                                                                 |             |
| Title                             | <a href="#">#1</a> Descriptive title identifying the study design, population, interventions, and, if applicable, trial acronym | 1           |
| Trial registration                | <a href="#">#2a</a> Trial identifier and registry name. If not yet                                                              | 2,11        |

|    |                     |                                                                     |                     |
|----|---------------------|---------------------------------------------------------------------|---------------------|
| 1  |                     | registered, name of intended registry                               |                     |
| 2  |                     |                                                                     |                     |
| 3  |                     |                                                                     |                     |
| 4  | Trial registration: | <a href="#">#2b</a> All items from the World Health Organization    | NA                  |
| 5  |                     |                                                                     |                     |
| 6  | data set            | Trial Registration Data Set                                         |                     |
| 7  |                     |                                                                     |                     |
| 8  |                     |                                                                     |                     |
| 9  | Protocol version    | <a href="#">#3</a> Date and version identifier                      | NA – only 1 version |
| 10 |                     |                                                                     |                     |
| 11 |                     |                                                                     | published           |
| 12 |                     |                                                                     |                     |
| 13 |                     |                                                                     |                     |
| 14 | Funding             | <a href="#">#4</a> Sources and types of financial, material, and    | 12                  |
| 15 |                     | other support                                                       |                     |
| 16 |                     |                                                                     |                     |
| 17 |                     |                                                                     |                     |
| 18 |                     |                                                                     |                     |
| 19 | Roles and           | <a href="#">#5a</a> Names, affiliations, and roles of protocol      | 1,12                |
| 20 |                     |                                                                     |                     |
| 21 | responsibilities:   | contributors                                                        |                     |
| 22 |                     |                                                                     |                     |
| 23 | contributorship     |                                                                     |                     |
| 24 |                     |                                                                     |                     |
| 25 |                     |                                                                     |                     |
| 26 |                     |                                                                     |                     |
| 27 | Roles and           | <a href="#">#5b</a> Name and contact information for the trial      | 1                   |
| 28 |                     |                                                                     |                     |
| 29 | responsibilities:   | sponsor                                                             |                     |
| 30 |                     |                                                                     |                     |
| 31 | sponsor contact     |                                                                     |                     |
| 32 |                     |                                                                     |                     |
| 33 | information         |                                                                     |                     |
| 34 |                     |                                                                     |                     |
| 35 |                     |                                                                     |                     |
| 36 |                     |                                                                     |                     |
| 37 | Roles and           | <a href="#">#5c</a> Role of study sponsor and funders, if any, in   | 12                  |
| 38 |                     |                                                                     |                     |
| 39 | responsibilities:   | study design; collection, management, analysis,                     |                     |
| 40 |                     |                                                                     |                     |
| 41 | sponsor and funder  | and interpretation of data; writing of the report;                  |                     |
| 42 |                     |                                                                     |                     |
| 43 |                     |                                                                     |                     |
| 44 |                     |                                                                     |                     |
| 45 |                     |                                                                     |                     |
| 46 |                     |                                                                     |                     |
| 47 |                     |                                                                     |                     |
| 48 |                     |                                                                     |                     |
| 49 |                     |                                                                     |                     |
| 50 |                     |                                                                     |                     |
| 51 | Roles and           | <a href="#">#5d</a> Composition, roles, and responsibilities of the | NA – no steering    |
| 52 |                     |                                                                     |                     |
| 53 | responsibilities:   | coordinating centre, steering committee,                            | committees etc      |
| 54 |                     |                                                                     |                     |
| 55 | committees          | endpoint adjudication committee, data                               |                     |
| 56 |                     |                                                                     |                     |
| 57 |                     |                                                                     |                     |
| 58 |                     |                                                                     |                     |
| 59 |                     |                                                                     |                     |
| 60 |                     |                                                                     |                     |

management team, and other individuals or groups overseeing the trial, if applicable (see Item 21a for data monitoring committee)

## Introduction

|                                                 |                     |                                                                                                                                                                                                            |     |
|-------------------------------------------------|---------------------|------------------------------------------------------------------------------------------------------------------------------------------------------------------------------------------------------------|-----|
| Background and rationale                        | <a href="#">#6a</a> | Description of research question and justification for undertaking the trial, including summary of relevant studies (published and unpublished) examining benefits and harms for each intervention         | 4,5 |
| Background and rationale: choice of comparators | <a href="#">#6b</a> | Explanation for choice of comparators                                                                                                                                                                      | 6   |
| Objectives                                      | <a href="#">#7</a>  | Specific objectives or hypotheses                                                                                                                                                                          | 4,5 |
| Trial design                                    | <a href="#">#8</a>  | Description of trial design including type of trial (eg, parallel group, crossover, factorial, single group), allocation ratio, and framework (eg, superiority, equivalence, non-inferiority, exploratory) | 5   |

## Methods:

### Participants, interventions, and outcomes

|               |                    |                                              |   |
|---------------|--------------------|----------------------------------------------|---|
| Study setting | <a href="#">#9</a> | Description of study settings (eg, community | 5 |
|---------------|--------------------|----------------------------------------------|---|

|    |                      |                                                                          |                       |
|----|----------------------|--------------------------------------------------------------------------|-----------------------|
| 1  |                      | clinic, academic hospital) and list of countries                         |                       |
| 2  |                      | where data will be collected. Reference to where                         |                       |
| 3  |                      | list of study sites can be obtained                                      |                       |
| 4  |                      |                                                                          |                       |
| 5  |                      |                                                                          |                       |
| 6  |                      |                                                                          |                       |
| 7  |                      |                                                                          |                       |
| 8  | Eligibility criteria | <a href="#">#10</a> Inclusion and exclusion criteria for participants.   | 5,6                   |
| 9  |                      |                                                                          |                       |
| 10 |                      | If applicable, eligibility criteria for study centres                    |                       |
| 11 |                      | and individuals who will perform the                                     |                       |
| 12 |                      | interventions (eg, surgeons, psychotherapists)                           |                       |
| 13 |                      |                                                                          |                       |
| 14 |                      |                                                                          |                       |
| 15 |                      |                                                                          |                       |
| 16 |                      |                                                                          |                       |
| 17 |                      |                                                                          |                       |
| 18 | Interventions:       | <a href="#">#11a</a> Interventions for each group with sufficient detail | 6                     |
| 19 |                      |                                                                          |                       |
| 20 | description          | to allow replication, including how and when                             |                       |
| 21 |                      | they will be administered                                                |                       |
| 22 |                      |                                                                          |                       |
| 23 |                      |                                                                          |                       |
| 24 |                      |                                                                          |                       |
| 25 |                      |                                                                          |                       |
| 26 | Interventions:       | <a href="#">#11b</a> Criteria for discontinuing or modifying allocated   | NA – participants are |
| 27 |                      |                                                                          |                       |
| 28 | modifications        | interventions for a given trial participant (eg,                         | given single dose of  |
| 29 |                      | drug dose change in response to harms,                                   | drug so cannot be     |
| 30 |                      | participant request, or improving / worsening                            | changed once given.   |
| 31 |                      | disease)                                                                 |                       |
| 32 |                      |                                                                          |                       |
| 33 |                      |                                                                          |                       |
| 34 |                      |                                                                          |                       |
| 35 |                      |                                                                          |                       |
| 36 |                      |                                                                          |                       |
| 37 |                      |                                                                          |                       |
| 38 | Interventions:       | <a href="#">#11c</a> Strategies to improve adherence to intervention     | NA – single dose      |
| 39 |                      |                                                                          |                       |
| 40 | adherence            | protocols, and any procedures for monitoring                             | treatments            |
| 41 |                      | adherence (eg, drug tablet return; laboratory                            |                       |
| 42 |                      | tests)                                                                   |                       |
| 43 |                      |                                                                          |                       |
| 44 |                      |                                                                          |                       |
| 45 |                      |                                                                          |                       |
| 46 |                      |                                                                          |                       |
| 47 |                      |                                                                          |                       |
| 48 | Interventions:       | <a href="#">#11d</a> Relevant concomitant care and interventions         | 5,6                   |
| 49 |                      |                                                                          |                       |
| 50 | concomitant care     | that are permitted or prohibited during the trial                        |                       |
| 51 |                      |                                                                          |                       |
| 52 |                      |                                                                          |                       |
| 53 | Outcomes             | <a href="#">#12</a> Primary, secondary, and other outcomes,              | 5                     |
| 54 |                      |                                                                          |                       |
| 55 |                      | including the specific measurement variable (eg,                         |                       |
| 56 |                      | systolic blood pressure), analysis metric (eg,                           |                       |
| 57 |                      |                                                                          |                       |
| 58 |                      |                                                                          |                       |
| 59 |                      |                                                                          |                       |
| 60 |                      |                                                                          |                       |

|    |                           |                                                                   |                  |
|----|---------------------------|-------------------------------------------------------------------|------------------|
| 1  |                           | change from baseline, final value, time to event),                |                  |
| 2  |                           | method of aggregation (eg, median, proportion),                   |                  |
| 3  |                           | and time point for each outcome. Explanation of                   |                  |
| 4  |                           | the clinical relevance of chosen efficacy and                     |                  |
| 5  |                           | harm outcomes is strongly recommended                             |                  |
| 6  |                           |                                                                   |                  |
| 7  |                           |                                                                   |                  |
| 8  |                           |                                                                   |                  |
| 9  |                           |                                                                   |                  |
| 10 |                           |                                                                   |                  |
| 11 |                           |                                                                   |                  |
| 12 | Participant timeline      | <a href="#">#13</a> Time schedule of enrolment, interventions     | 5,8              |
| 13 |                           | (including any run-ins and washouts),                             |                  |
| 14 |                           | assessments, and visits for participants. A                       |                  |
| 15 |                           | schematic diagram is highly recommended (see                      |                  |
| 16 |                           | Figure)                                                           |                  |
| 17 |                           |                                                                   |                  |
| 18 |                           |                                                                   |                  |
| 19 |                           |                                                                   |                  |
| 20 |                           |                                                                   |                  |
| 21 |                           |                                                                   |                  |
| 22 |                           |                                                                   |                  |
| 23 |                           |                                                                   |                  |
| 24 |                           |                                                                   |                  |
| 25 | Sample size               | <a href="#">#14</a> Estimated number of participants needed to    | 9                |
| 26 |                           | achieve study objectives and how it was                           |                  |
| 27 |                           | determined, including clinical and statistical                    |                  |
| 28 |                           | assumptions supporting any sample size                            |                  |
| 29 |                           | calculations                                                      |                  |
| 30 |                           |                                                                   |                  |
| 31 |                           |                                                                   |                  |
| 32 |                           |                                                                   |                  |
| 33 |                           |                                                                   |                  |
| 34 |                           |                                                                   |                  |
| 35 |                           |                                                                   |                  |
| 36 |                           |                                                                   |                  |
| 37 | Recruitment               | <a href="#">#15</a> Strategies for achieving adequate participant | 5,6              |
| 38 |                           | enrolment to reach target sample size                             |                  |
| 39 |                           |                                                                   |                  |
| 40 |                           |                                                                   |                  |
| 41 |                           |                                                                   |                  |
| 42 | <b>Methods:</b>           |                                                                   |                  |
| 43 |                           |                                                                   |                  |
| 44 | <b>Assignment of</b>      |                                                                   |                  |
| 45 | <b>interventions (for</b> |                                                                   |                  |
| 46 | <b>controlled trials)</b> |                                                                   |                  |
| 47 |                           |                                                                   |                  |
| 48 |                           |                                                                   |                  |
| 49 |                           |                                                                   |                  |
| 50 |                           |                                                                   |                  |
| 51 |                           |                                                                   |                  |
| 52 | Allocation:               | <a href="#">#16a</a> Method of generating the allocation sequence | NA – no          |
| 53 | sequence                  | (eg, computer-generated random numbers), and                      | randomization or |
| 54 | generation                | list of any factors for stratification. To reduce                 | blinding         |
| 55 |                           |                                                                   |                  |
| 56 |                           |                                                                   |                  |
| 57 |                           |                                                                   |                  |
| 58 |                           |                                                                   |                  |
| 59 |                           |                                                                   |                  |
| 60 |                           |                                                                   |                  |

1 predictability of a random sequence, details of  
 2 any planned restriction (eg, blocking) should be  
 3 provided in a separate document that is  
 4 unavailable to those who enrol participants or  
 5 assign interventions  
 6  
 7  
 8  
 9  
 10

|    |                     |                      |                                                  |
|----|---------------------|----------------------|--------------------------------------------------|
| 11 |                     |                      |                                                  |
| 12 | Allocation          | <a href="#">#16b</a> | Mechanism of implementing the allocation         |
| 13 |                     |                      |                                                  |
| 14 | concealment         |                      | sequence (eg, central telephone; sequentially    |
| 15 |                     |                      | numbered, opaque, sealed envelopes),             |
| 16 | mechanism           |                      | describing any steps to conceal the sequence     |
| 17 |                     |                      | until interventions are assigned                 |
| 18 |                     |                      |                                                  |
| 19 |                     |                      |                                                  |
| 20 |                     |                      |                                                  |
| 21 |                     |                      |                                                  |
| 22 |                     |                      |                                                  |
| 23 |                     |                      |                                                  |
| 24 | Allocation:         | <a href="#">#16c</a> | Who will generate the allocation sequence, who   |
| 25 |                     |                      | will enrol participants, and who will assign     |
| 26 | implementation      |                      | participants to interventions                    |
| 27 |                     |                      |                                                  |
| 28 |                     |                      |                                                  |
| 29 |                     |                      |                                                  |
| 30 |                     |                      |                                                  |
| 31 |                     |                      |                                                  |
| 32 | Blinding (masking)  | <a href="#">#17a</a> | Who will be blinded after assignment to          |
| 33 |                     |                      | interventions (eg, trial participants, care      |
| 34 |                     |                      | providers, outcome assessors, data analysts),    |
| 35 |                     |                      | and how                                          |
| 36 |                     |                      |                                                  |
| 37 |                     |                      |                                                  |
| 38 |                     |                      |                                                  |
| 39 |                     |                      |                                                  |
| 40 |                     |                      |                                                  |
| 41 |                     |                      |                                                  |
| 42 | Blinding (masking): | <a href="#">#17b</a> | If blinded, circumstances under which unblinding |
| 43 |                     |                      | is permissible, and procedure for revealing a    |
| 44 | emergency           |                      | participant's allocated intervention during the  |
| 45 |                     |                      | trial                                            |
| 46 | unblinding          |                      |                                                  |
| 47 |                     |                      |                                                  |
| 48 |                     |                      |                                                  |
| 49 |                     |                      |                                                  |
| 50 |                     |                      |                                                  |

51  
 52 **Methods: Data**  
 53  
 54 **collection,**  
 55  
 56  
 57 **management, and**  
 58  
 59  
 60



1 **analysis**

2

3

4 Data collection plan [#18a](#) Plans for assessment and collection of outcome, 5,6,7,8

5

6 baseline, and other trial data, including any

7

8 related processes to promote data quality (eg,

9

10 duplicate measurements, training of assessors)

11

12 and a description of study instruments (eg,

13

14 questionnaires, laboratory tests) along with their

15

16 reliability and validity, if known. Reference to

17

18 where data collection forms can be found, if not

19

20 in the protocol

21

22

23

24

25 Data collection [#18b](#) Plans to promote participant retention and NA

26

27 plan: retention complete follow-up, including list of any outcome

28

29 data to be collected for participants who

30

31 discontinue or deviate from intervention

32

33 protocols

34

35

36

37 Data management [#19](#) Plans for data entry, coding, security, and 6,7,8

38

39 storage, including any related processes to

40

41 promote data quality (eg, double data entry;

42

43 range checks for data values). Reference to

44

45 where details of data management procedures

46

47 can be found, if not in the protocol

48

49

50

51 Statistics: outcomes [#20a](#) Statistical methods for analysing primary and 9,10

52

53 secondary outcomes. Reference to where other

54

55 details of the statistical analysis plan can be

56

57 found, if not in the protocol

58

59

60

|    |                        |                      |                                                   |                |
|----|------------------------|----------------------|---------------------------------------------------|----------------|
| 1  | Statistics: additional | <a href="#">#20b</a> | Methods for any additional analyses (eg,          | 9,10           |
| 2  |                        |                      |                                                   |                |
| 3  | analyses               |                      | subgroup and adjusted analyses)                   |                |
| 4  |                        |                      |                                                   |                |
| 5  |                        |                      |                                                   |                |
| 6  | Statistics: analysis   | <a href="#">#20c</a> | Definition of analysis population relating to     | 9,10           |
| 7  |                        |                      |                                                   |                |
| 8  | population and         |                      | protocol non-adherence (eg, as randomised         |                |
| 9  |                        |                      |                                                   |                |
| 10 | missing data           |                      | analysis), and any statistical methods to handle  |                |
| 11 |                        |                      |                                                   |                |
| 12 |                        |                      | missing data (eg, multiple imputation)            |                |
| 13 |                        |                      |                                                   |                |
| 14 |                        |                      |                                                   |                |
| 15 |                        |                      |                                                   |                |
| 16 | <b>Methods:</b>        |                      |                                                   |                |
| 17 |                        |                      |                                                   |                |
| 18 | <b>Monitoring</b>      |                      |                                                   |                |
| 19 |                        |                      |                                                   |                |
| 20 |                        |                      |                                                   |                |
| 21 |                        |                      |                                                   |                |
| 22 | Data monitoring:       | <a href="#">#21a</a> | Composition of data monitoring committee          | NA – no DMC    |
| 23 |                        |                      |                                                   |                |
| 24 | formal committee       |                      | (DMC); summary of its role and reporting          |                |
| 25 |                        |                      |                                                   |                |
| 26 |                        |                      | structure; statement of whether it is independent |                |
| 27 |                        |                      |                                                   |                |
| 28 |                        |                      | from the sponsor and competing interests; and     |                |
| 29 |                        |                      |                                                   |                |
| 30 |                        |                      | reference to where further details about its      |                |
| 31 |                        |                      |                                                   |                |
| 32 |                        |                      | charter can be found, if not in the protocol.     |                |
| 33 |                        |                      |                                                   |                |
| 34 |                        |                      | Alternatively, an explanation of why a DMC is     |                |
| 35 |                        |                      |                                                   |                |
| 36 |                        |                      | not needed                                        |                |
| 37 |                        |                      |                                                   |                |
| 38 |                        |                      |                                                   |                |
| 39 |                        |                      |                                                   |                |
| 40 |                        |                      |                                                   |                |
| 41 | Data monitoring:       | <a href="#">#21b</a> | Description of any interim analyses and stopping  | NA- no interim |
| 42 |                        |                      |                                                   |                |
| 43 | interim analysis       |                      | guidelines, including who will have access to     | analyses       |
| 44 |                        |                      |                                                   |                |
| 45 |                        |                      | these interim results and make the final decision |                |
| 46 |                        |                      |                                                   |                |
| 47 |                        |                      | to terminate the trial                            |                |
| 48 |                        |                      |                                                   |                |
| 49 |                        |                      |                                                   |                |
| 50 |                        |                      |                                                   |                |
| 51 | Harms                  | <a href="#">#22</a>  | Plans for collecting, assessing, reporting, and   | 8              |
| 52 |                        |                      |                                                   |                |
| 53 |                        |                      | managing solicited and spontaneously reported     |                |
| 54 |                        |                      |                                                   |                |
| 55 |                        |                      | adverse events and other unintended effects of    |                |
| 56 |                        |                      |                                                   |                |
| 57 |                        |                      | trial interventions or trial conduct              |                |
| 58 |                        |                      |                                                   |                |
| 59 |                        |                      |                                                   |                |
| 60 |                        |                      |                                                   |                |

|    |                      |                      |                                                      |     |
|----|----------------------|----------------------|------------------------------------------------------|-----|
| 1  | Auditing             | <a href="#">#23</a>  | Frequency and procedures for auditing trial          | NA  |
| 2  |                      |                      |                                                      |     |
| 3  |                      |                      |                                                      |     |
| 4  |                      |                      | conduct, if any, and whether the process will be     |     |
| 5  |                      |                      |                                                      |     |
| 6  |                      |                      | independent from investigators and the sponsor       |     |
| 7  |                      |                      |                                                      |     |
| 8  |                      |                      |                                                      |     |
| 9  | <b>Ethics and</b>    |                      |                                                      |     |
| 10 |                      |                      |                                                      |     |
| 11 | <b>dissemination</b> |                      |                                                      |     |
| 12 |                      |                      |                                                      |     |
| 13 |                      |                      |                                                      |     |
| 14 | Research ethics      | <a href="#">#24</a>  | Plans for seeking research ethics committee /        | 10  |
| 15 |                      |                      |                                                      |     |
| 16 | approval             |                      | institutional review board (REC / IRB) approval      |     |
| 17 |                      |                      |                                                      |     |
| 18 |                      |                      |                                                      |     |
| 19 | Protocol             | <a href="#">#25</a>  | Plans for communicating important protocol           | NA  |
| 20 |                      |                      |                                                      |     |
| 21 | amendments           |                      | modifications (eg, changes to eligibility criteria,  |     |
| 22 |                      |                      | outcomes, analyses) to relevant parties (eg,         |     |
| 23 |                      |                      |                                                      |     |
| 24 |                      |                      | investigators, REC / IRBs, trial participants, trial |     |
| 25 |                      |                      |                                                      |     |
| 26 |                      |                      | registries, journals, regulators)                    |     |
| 27 |                      |                      |                                                      |     |
| 28 |                      |                      |                                                      |     |
| 29 |                      |                      |                                                      |     |
| 30 |                      |                      |                                                      |     |
| 31 | Consent or assent    | <a href="#">#26a</a> | Who will obtain informed consent or assent from      | 5,6 |
| 32 |                      |                      |                                                      |     |
| 33 |                      |                      | potential trial participants or authorised           |     |
| 34 |                      |                      |                                                      |     |
| 35 |                      |                      | surrogates, and how (see Item 32)                    |     |
| 36 |                      |                      |                                                      |     |
| 37 |                      |                      |                                                      |     |
| 38 |                      |                      |                                                      |     |
| 39 | Consent or assent:   | <a href="#">#26b</a> | Additional consent provisions for collection and     | NA  |
| 40 |                      |                      |                                                      |     |
| 41 | ancillary studies    |                      | use of participant data and biological specimens     |     |
| 42 |                      |                      |                                                      |     |
| 43 |                      |                      | in ancillary studies, if applicable                  |     |
| 44 |                      |                      |                                                      |     |
| 45 |                      |                      |                                                      |     |
| 46 |                      |                      |                                                      |     |
| 47 | Confidentiality      | <a href="#">#27</a>  | How personal information about potential and         | 8   |
| 48 |                      |                      |                                                      |     |
| 49 |                      |                      | enrolled participants will be collected, shared,     |     |
| 50 |                      |                      |                                                      |     |
| 51 |                      |                      | and maintained in order to protect confidentiality   |     |
| 52 |                      |                      |                                                      |     |
| 53 |                      |                      | before, during, and after the trial                  |     |
| 54 |                      |                      |                                                      |     |
| 55 |                      |                      |                                                      |     |
| 56 |                      |                      |                                                      |     |
| 57 | Declaration of       | <a href="#">#28</a>  | Financial and other competing interests for          | 11  |
| 58 |                      |                      |                                                      |     |
| 59 |                      |                      |                                                      |     |
| 60 |                      |                      |                                                      |     |

|    |                       |                      |                                                    |      |
|----|-----------------------|----------------------|----------------------------------------------------|------|
| 1  | interests             |                      | principal investigators for the overall trial and  |      |
| 2  |                       |                      | each study site                                    |      |
| 3  |                       |                      |                                                    |      |
| 4  |                       |                      |                                                    |      |
| 5  |                       |                      |                                                    |      |
| 6  | Data access           | <a href="#">#29</a>  | Statement of who will have access to the final     | 11   |
| 7  |                       |                      | trial dataset, and disclosure of contractual       |      |
| 8  |                       |                      | agreements that limit such access for              |      |
| 9  |                       |                      | investigators                                      |      |
| 10 |                       |                      |                                                    |      |
| 11 |                       |                      |                                                    |      |
| 12 |                       |                      |                                                    |      |
| 13 |                       |                      |                                                    |      |
| 14 |                       |                      |                                                    |      |
| 15 | Ancillary and post    | <a href="#">#30</a>  | Provisions, if any, for ancillary and post-trial   | NA   |
| 16 | trial care            |                      | care, and for compensation to those who suffer     |      |
| 17 |                       |                      | harm from trial participation                      |      |
| 18 |                       |                      |                                                    |      |
| 19 |                       |                      |                                                    |      |
| 20 |                       |                      |                                                    |      |
| 21 |                       |                      |                                                    |      |
| 22 |                       |                      |                                                    |      |
| 23 | Dissemination         | <a href="#">#31a</a> | Plans for investigators and sponsor to             | 11   |
| 24 | policy: trial results |                      | communicate trial results to participants,         |      |
| 25 |                       |                      | healthcare professionals, the public, and other    |      |
| 26 |                       |                      | relevant groups (eg, via publication, reporting in |      |
| 27 |                       |                      | results databases, or other data sharing           |      |
| 28 |                       |                      | arrangements), including any publication           |      |
| 29 |                       |                      | restrictions                                       |      |
| 30 |                       |                      |                                                    |      |
| 31 |                       |                      |                                                    |      |
| 32 |                       |                      |                                                    |      |
| 33 |                       |                      |                                                    |      |
| 34 |                       |                      |                                                    |      |
| 35 |                       |                      |                                                    |      |
| 36 |                       |                      |                                                    |      |
| 37 |                       |                      |                                                    |      |
| 38 |                       |                      |                                                    |      |
| 39 |                       |                      |                                                    |      |
| 40 | Dissemination         | <a href="#">#31b</a> | Authorship eligibility guidelines and any          | 12   |
| 41 | policy: authorship    |                      | intended use of professional writers               |      |
| 42 |                       |                      |                                                    |      |
| 43 |                       |                      |                                                    |      |
| 44 |                       |                      |                                                    |      |
| 45 | Dissemination         | <a href="#">#31c</a> | Plans, if any, for granting public access to the   | 11   |
| 46 | policy: reproducible  |                      | full protocol, participant-level dataset, and      |      |
| 47 | research              |                      | statistical code                                   |      |
| 48 |                       |                      |                                                    |      |
| 49 |                       |                      |                                                    |      |
| 50 |                       |                      |                                                    |      |
| 51 |                       |                      |                                                    |      |
| 52 |                       |                      |                                                    |      |
| 53 | <b>Appendices</b>     |                      |                                                    |      |
| 54 |                       |                      |                                                    |      |
| 55 |                       |                      |                                                    |      |
| 56 | Informed consent      | <a href="#">#32</a>  | Model consent form and other related               | Supp |
| 57 |                       |                      |                                                    |      |
| 58 |                       |                      |                                                    |      |
| 59 |                       |                      |                                                    |      |
| 60 |                       |                      |                                                    |      |

|    |            |                     |                                                  |         |
|----|------------|---------------------|--------------------------------------------------|---------|
| 1  | materials  |                     | documentation given to participants and          |         |
| 2  |            |                     |                                                  |         |
| 3  |            |                     | authorised surrogates                            |         |
| 4  |            |                     |                                                  |         |
| 5  |            |                     |                                                  |         |
| 6  | Biological | <a href="#">#33</a> | Plans for collection, laboratory evaluation, and | 6.7,8,9 |
| 7  |            |                     |                                                  |         |
| 8  | specimens  |                     | storage of biological specimens for genetic or   |         |
| 9  |            |                     |                                                  |         |
| 10 |            |                     | molecular analysis in the current trial and for  |         |
| 11 |            |                     |                                                  |         |
| 12 |            |                     | future use in ancillary studies, if applicable   |         |
| 13 |            |                     |                                                  |         |
| 14 |            |                     |                                                  |         |
| 15 |            |                     |                                                  |         |

16 None The SPIRIT Explanation and Elaboration paper is distributed under the terms of the Creative  
17 Commons Attribution License CC-BY-NC. This checklist can be completed online using  
18 <https://www.goodreports.org/>, a tool made by the [EQUATOR Network](#) in collaboration with  
19 [Penelope.ai](#)  
20  
21  
22  
23  
24  
25  
26  
27  
28  
29  
30  
31  
32  
33  
34  
35  
36  
37  
38  
39  
40  
41  
42  
43  
44  
45  
46  
47  
48  
49  
50  
51  
52  
53  
54  
55  
56  
57  
58  
59  
60

# BMJ Open

## Optimisation of treatments for oral *Neisseria gonorrhoeae* infection: Pharmacokinetics Study (STI-PK project) – Study protocol for non-randomised clinical trial

|                                 |                                                                                                                                                                                                                                                                                                                                                                                                                                                                                                                                                                                                                                                                                                                                                                                                                                                                                                                                                                                                                                                                                                                                                                                                                                                                                                                                                                                                                                                                                                                                                                                                                                                                                                                                                                                                                                                                                                                                                                                                                                                |
|---------------------------------|------------------------------------------------------------------------------------------------------------------------------------------------------------------------------------------------------------------------------------------------------------------------------------------------------------------------------------------------------------------------------------------------------------------------------------------------------------------------------------------------------------------------------------------------------------------------------------------------------------------------------------------------------------------------------------------------------------------------------------------------------------------------------------------------------------------------------------------------------------------------------------------------------------------------------------------------------------------------------------------------------------------------------------------------------------------------------------------------------------------------------------------------------------------------------------------------------------------------------------------------------------------------------------------------------------------------------------------------------------------------------------------------------------------------------------------------------------------------------------------------------------------------------------------------------------------------------------------------------------------------------------------------------------------------------------------------------------------------------------------------------------------------------------------------------------------------------------------------------------------------------------------------------------------------------------------------------------------------------------------------------------------------------------------------|
| Journal:                        | <i>BMJ Open</i>                                                                                                                                                                                                                                                                                                                                                                                                                                                                                                                                                                                                                                                                                                                                                                                                                                                                                                                                                                                                                                                                                                                                                                                                                                                                                                                                                                                                                                                                                                                                                                                                                                                                                                                                                                                                                                                                                                                                                                                                                                |
| Manuscript ID                   | bmjopen-2022-064782.R1                                                                                                                                                                                                                                                                                                                                                                                                                                                                                                                                                                                                                                                                                                                                                                                                                                                                                                                                                                                                                                                                                                                                                                                                                                                                                                                                                                                                                                                                                                                                                                                                                                                                                                                                                                                                                                                                                                                                                                                                                         |
| Article Type:                   | Protocol                                                                                                                                                                                                                                                                                                                                                                                                                                                                                                                                                                                                                                                                                                                                                                                                                                                                                                                                                                                                                                                                                                                                                                                                                                                                                                                                                                                                                                                                                                                                                                                                                                                                                                                                                                                                                                                                                                                                                                                                                                       |
| Date Submitted by the Author:   | 13-Sep-2022                                                                                                                                                                                                                                                                                                                                                                                                                                                                                                                                                                                                                                                                                                                                                                                                                                                                                                                                                                                                                                                                                                                                                                                                                                                                                                                                                                                                                                                                                                                                                                                                                                                                                                                                                                                                                                                                                                                                                                                                                                    |
| Complete List of Authors:       | <p>Kong, Fabian; The University of Melbourne Centre for Epidemiology and Biostatistics, Melbourne School of Population and Global Health<br/> Unemo, Magnus; Örebro University, WHO Collaborating Centre for Gonorrhoea and Other STIs, National Reference Laboratory for Sexually Transmitted Infections, Department of Laboratory Medicine, Microbiology; University College London, Institute for Global Health<br/> Lim, Shueh; The University of Melbourne School of Population and Global Health, Centre for Epidemiology and Biostatistics<br/> Latch, Ngaire; The University of Melbourne School of Population and Global Health, Centre for Epidemiology and Biostatistics, Melbourne School of Population and Global Health<br/> Williamson, DA; The Peter Doherty Institute for Infection and Immunity, Department of Infectious Diseases; Walter and Eliza Hall Institute of Medical Research<br/> Roberts, Jason; The University of Queensland Centre for Clinical Research; Royal Brisbane and Women's Hospital, Departments of Pharmacy and Intensive Care Medicine<br/> Wallis, Steven C; The University of Queensland Centre for Clinical Research<br/> Parker, Suzanne; The University of Queensland Centre for Clinical Research<br/> Landersdorfer, Cornelia; Monash University Faculty of Pharmacy and Pharmaceutical Sciences<br/> Yap, Tami; The University of Melbourne, Melbourne Dental School<br/> Fairley, Christopher; Melbourne Sexual Health Centre, Alfred Health; Monash University Central Clinical School<br/> Chow, Eric; Monash University, Central Clinical School, Faculty of Medicine, Nursing and Health Sciences; Melbourne Sexual Health Centre, Alfred Health<br/> Lewis, David ; The University of Sydney Westmead Clinical School; Western Sydney Sexual Health Centre, Western Sydney Local Health District<br/> Hammoud, Mohamed ; UNSW, Kirby Institute<br/> Hocking, Jane; The University of Melbourne School of Population and Global Health, Centre for Epidemiology and Biostatistics</p> |
| <b>Primary Subject Heading</b>: | Infectious diseases                                                                                                                                                                                                                                                                                                                                                                                                                                                                                                                                                                                                                                                                                                                                                                                                                                                                                                                                                                                                                                                                                                                                                                                                                                                                                                                                                                                                                                                                                                                                                                                                                                                                                                                                                                                                                                                                                                                                                                                                                            |

1  
2  
3  
4  
5  
6  
7  
8  
9  
10  
11  
12  
13  
14  
15  
16  
17  
18  
19  
20  
21  
22  
23  
24  
25  
26  
27  
28  
29  
30  
31  
32  
33  
34  
35  
36  
37  
38  
39  
40  
41  
42  
43  
44  
45  
46  
47  
48  
49  
50  
51  
52  
53  
54  
55  
56  
57  
58  
59  
60

|                            |                                                                           |
|----------------------------|---------------------------------------------------------------------------|
| Secondary Subject Heading: | Epidemiology, Pharmacology and therapeutics, Public health, Sexual health |
| Keywords:                  | INFECTIOUS DISEASES, CLINICAL PHARMACOLOGY, SEXUAL MEDICINE               |
|                            |                                                                           |

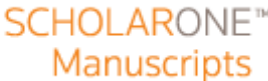

1  
2 Optimisation of treatments for oral *Neisseria gonorrhoeae* infection: Pharmacokinetics  
3 Study (STI-PK project) – Study protocol for non-randomised clinical trial

4 **Fabian YS Kong<sup>1</sup>, Magnus Unemo<sup>2,3</sup>, Shueh H Lim<sup>1,4</sup>, Ngaire Latch<sup>1</sup>, Deborah A Williamson<sup>5,6</sup>,**  
5 **Jason A Roberts<sup>7,8,9,10</sup>, Steven C Wallis<sup>7</sup>, Suzanne L Parker<sup>7</sup>, Cornelia B Landersdorfer<sup>11</sup>, Tami**  
6 **Yap<sup>12</sup>, Christopher K Fairley<sup>13,14</sup>, Eric PF Chow<sup>1,13,14</sup>, David A Lewis<sup>15,16</sup>, Mohamed A**  
7 **Hammoud<sup>17</sup>, Jane S Hocking<sup>1</sup>**  
8  
9

10 <sup>1</sup>Centre for Epidemiology and Biostatistics, Melbourne School of Population and Global  
11 Health, University of Melbourne, Victoria, Australia

12 <sup>2</sup>WHO Collaborating Centre for Gonorrhoea and Other STIs, National Reference Laboratory  
13 for Sexually Transmitted Infections, Department of Laboratory Medicine, Microbiology,  
14 Örebro University, Örebro, Sweden

15 <sup>3</sup>Institute for Global Health, University College London (UCL), London, United Kingdom

16 <sup>4</sup>The Crane General Practice, Clifton Hill, Victoria, Australia

17 <sup>5</sup>Department of Infectious Diseases, University of Melbourne at the Peter Doherty Institute  
18 for Infection and Immunity, University of Melbourne, Parkville, Victoria, Australia

19 <sup>6</sup>Walter and Eliza Hall Institute of Medical Research, Parkville, Victoria, Australia

20 <sup>7</sup>University of Queensland Centre for Clinical Research, Faculty of Medicine and University of  
21 Queensland, Brisbane, Queensland, Australia

22 <sup>8</sup>Herston Infectious Diseases Institute (HeIDI), Metro North Health, Brisbane, Australia

23 <sup>9</sup>Departments of Pharmacy and Intensive Care Medicine, Royal Brisbane and Women's  
24 Hospital, Brisbane, Australia

25 <sup>10</sup>Division of Anaesthesiology Critical Care Emergency and Pain Medicine, Nîmes University  
26 Hospital, University of Montpellier, Nîmes France

27 <sup>11</sup>Monash Institute of Pharmaceutical Sciences, Monash University, Parkville, Victoria,  
28 Australia

29 <sup>12</sup>Melbourne Dental School, The University of Melbourne, Victoria, Australia

30 <sup>13</sup>Melbourne Sexual Health Centre, Alfred Health, Melbourne, Victoria, Australia

31 <sup>14</sup>Central Clinical School, Faculty of Medicine, Nursing and Health Sciences, Monash  
32 University, Melbourne, Victoria, Australia

33 <sup>15</sup>Westmead Clinical School and Sydney Institute for Infectious Diseases, The University of  
34 Sydney, Sydney, New South Wales, Australia

35 <sup>16</sup>Western Sydney Sexual Health Centre, Western Sydney Local Health District, Parramatta,  
36 New South Wales, Australia

37 <sup>17</sup>Kirby Institute, University of NSW Sydney, New South Wales, Australia

38  
39  
40  
41  
42  
43  
44  
45  
46  
47 **Corresponding author:**

48 Dr Fabian Kong

49 Address: Melbourne School of Population and Global Health, University of Melbourne, 3/207  
50 Bouverie St, Melbourne, Australia 3004.

51 Tel: +61 3 9035 3039, Fax: + 61 3 9349 5815

52 Email: kongf@unimelb.edu.au  
53  
54  
55  
56  
57  
58  
59  
60



## Abstract

### Introduction:

*Neisseria gonorrhoeae* infections are common and incidence increasing. Oropharyngeal infections are associated with greater treatment failure compared to other sites and drive transmission to anogenital sites through saliva. Gonococcal resistance is increasing and new treatments are scarce, therefore clinicians must optimise currently available and emerging treatments in order to have efficacious therapeutic options. This requires pharmacokinetic data from the oral cavity/oropharynx, however availability of such information is currently limited.

### Methods and analysis:

Healthy male volunteers (participants) recruited into the study will receive single doses of either ceftriaxone 1g, cefixime 400mg or ceftriaxone 500mg plus 2g azithromycin. Participants will provide samples at 4-7 time points post-dose (treatment regimen dependent) from four oral sites, two oral fluids, one anorectal swab and blood. Participants will complete online questionnaires about their medical history, sexual practices and any side effects experienced up to day 5-7. Saliva/oral mucosal pH and oral microbiome analysis will be undertaken. Bioanalysis will be conducted by liquid chromatography-mass spectrometry. Drug concentrations over time will be used to develop mathematical models for optimisation of drug dosing regimens and to estimate pharmacodynamic targets of efficacy.

### Ethics and dissemination:

This study was approved by Royal Melbourne Hospital Human Research Ethics Committee (60370/MH-2021). The study results will be submitted for publication in peer-reviewed journals and reported at conferences. Summary results will be sent to participants requesting them. All data relevant to the study will be included in the article or uploaded as supplementary information.

Trial registration: Australian New Zealand Clinical Trial Registry - ACTRN12621000339853

**Key words:** *Neisseria gonorrhoeae*, pharmacokinetics, oropharyngeal, efficacy

## Strengths and limitations of this study

- This is the first comprehensive study to collect pharmacokinetic data of drugs used to treat gonorrhoea in the oral space from four oral sites, two oral fluids and blood. The data is complemented by data at the anorectal site for comparison.
- This data will inform optimisation of drugs to treat oropharyngeal gonorrhoea and develop methods to apply to drugs in phase 2 or 3 randomised controlled clinical trials.
- While we did not obtain true tissue samples (e.g. via biopsies) but rather swabs of surface mucosa, this will still allow examination of drug distribution by oral cell type, for an infection that is primarily at the epithelial surface.
- The study does not include women or those with oropharyngeal gonorrhoea infections.
- As we only include healthy volunteers, there is no data on bacterial minimum inhibitory concentrations to assess antimicrobial resistance and unable to generate real-world pharmacodynamic data but we will estimate PK/PD target achievement based on the PK data and models using various *Neisseria gonorrhoeae* MICs.

## INTRODUCTION

*Neisseria gonorrhoeae* (NG) is the second most common bacterial sexually transmitted infection (STI) globally.<sup>1</sup> Over the last ten years, NG infections have increased markedly – by 370% in Australia,<sup>2</sup> 75% in the USA,<sup>3</sup> and 250% in the UK.<sup>4</sup> Oropharyngeal NG is common with a prevalence of approximately 2%<sup>5</sup> and 5%<sup>5</sup> among heterosexuals and men who have sex with men (MSM) attending clinical services, respectively. Oropharyngeal infections are important because (i) cure rates at the oral site are up to 20% lower than at the genital site;<sup>6</sup> (ii) play a major role in transmission in the population through oral sex and use of saliva<sup>7</sup> and (iii) they are more likely to facilitate the development of antimicrobial resistance (AMR).<sup>8</sup> NG has now developed resistance to all classes of antibiotics recommended for gonorrhoea treatment<sup>9</sup> and in 2017, the World Health Organization (WHO) declared AMR NG as an urgent global threat.<sup>10</sup> Therefore, ensuring continued access to effective treatments remains a global challenge.

There is a scarcity of pharmacokinetic (PK) data for antibiotics in the oral cavity or oropharynx, and it remains unclear if lower oropharyngeal NG cure rates are due to inadequate tissue concentrations of antibiotics at the oral sites where NG grows. PK data for NG treatments in the oropharynx are currently only available for the tonsils.<sup>11</sup> However, it is not well understood where NG infects the oropharynx or oral cavity. Further, there are no PK data available for the mouth for emerging NG treatments currently in phase 2-3 randomized controlled clinical trials (RCTs). It is unlikely that any new STI drugs will reach the market in the near future<sup>12</sup> as the few drugs in current phase 2-3 trials are either producing estimates below the CDC efficacy criteria of 95%<sup>13</sup> for treating oral NG or have not been appropriately evaluated for oral infection. This does not provide much optimism unless drug therapy can be optimised by changing the dosing regimen. However, optimisation needs PK data at the site of infection, i.e. oral tissue.

We are conducting a non-randomised trial to generate comprehensive human PK data for oral NG treatments. These data can then be used to optimise available treatments and improve their efficacy to break the ongoing transmission and development of AMR. This paper describes the study methodologies for collecting PK data on currently recommended antimicrobial treatments for oropharyngeal NG (ceftriaxone 1g, cefixime 400mg and ceftriaxone 500mg plus 2g azithromycin) from human blood, four oral sites, and two oral fluids. Given the scarcity of PK data for the anorectum, we will also take the opportunity to measure antibiotic concentrations in the anorectum, although cure rates for anorectal NG are much higher compared to oral NG.

## RESEARCH AIM AND HYPOTHESIS

The primary aim of this study is to determine the PK properties of antibiotics to treat NG in the oral cavity (tongue, gingival crevicular fluid (GCF), saliva) and oropharynx – collectively referred to as “oral” in this protocol. Our secondary aims are to (a) determine pharmacodynamic (PD) targets at the oral site; (b) measure pH in the oral site; (c) assess the impact of the treatments on the oral microbiome; and (d) measure antibiotic concentrations in anorectal mucosal tissue. This study will specifically explore the PK of recommended oral NG treatments at the time of the study design, namely single doses of ceftriaxone 1g,<sup>14</sup>

1  
2 ceftriaxone 500mg plus 2g azithromycin<sup>15</sup> and cefixime 400mg.<sup>16 17</sup> These drugs have been  
3 selected for evaluation because they represent the main antibiotics likely to be used  
4 prospectively and amenable to optimisation.  
5

6 Our hypothesis is the PK properties of drugs vary by the site of infection resulting in  
7 differences in treatment efficacy, especially at non-urogenital sites such as at the oral and  
8 anorectal site. Therefore, different treatment regimens are needed for the optimal treatment  
9 of non-urogenital NG infections.  
10  
11

## 12 **OUTCOMES**

### 13 Primary outcome

14 Our primary outcome is to estimate PK data for each antibiotic, including: drug concentrations  
15 (total and protein unbound in blood and saliva)(C), peak concentrations (C<sub>max</sub>), time to reach  
16 C<sub>max</sub> (T<sub>max</sub>), area under the concentration-time curve (AUC - first 24 hours: AUC<sub>0-24</sub>; total:  
17 AUC<sub>0-∞</sub>), absorption rate constant (K<sub>a</sub>), clearance (CL), volume of distribution (V<sub>d</sub>), and half-  
18 life (T<sub>1/2</sub>). These data will be estimated in blood (venous or peripheral blood), tissue/mucosa  
19 (oral and anorectal), saliva and gingival crevicular fluid (GCF).  
20  
21  
22

### 23 Secondary outcomes

24 The magnitude of the PK/PD targets will be estimated by calculating (a) the percentage of  
25 time during which the protein unbound drug concentration exceeds the minimum inhibitory  
26 concentration (MIC) (%fT>MIC) for cephalosporins (b) the ratio of the area under the unbound  
27 drug concentration-time curve to the MIC (fAUC/MIC) for azithromycin and (c) the ratio of  
28 the maximum unbound drug concentration to the MIC (fC<sub>max</sub>/MIC) for azithromycin.  
29  
30  
31

32 We will also measure the pH of the oral mucosa and saliva, saliva flow rate and oral  
33 microbiome changes. We will obtain PK data for each antibiotic in anorectal mucosa to  
34 compare to those at the oral sites.  
35

## 36 **METHODS AND ANALYSIS**

### 37 Study design and setting

38 This is a non-randomised, open label antibiotic trial among healthy volunteers. The trial will  
39 be conducted in an urban general practice in Victoria, Australia.  
40  
41  
42  
43

### 44 Duration of study

45 For those receiving monotherapy with ceftriaxone 1g or cefixime 400mg, the study requires  
46 three in-person visits (over 3 days) and for those receiving dual therapy with ceftriaxone  
47 500mg plus 2g azithromycin, five in-person visits (over 14 days) are required. Online self-  
48 administered questionnaires are completed during and after these visits. Recruitment  
49 commenced in April 2022 with anticipated completion by June 2023.  
50  
51

### 52 Participants

#### 53 Recruitment

54 Healthy men who self-report they are free of STIs will be recruited through advertising on  
55 social media (including Twitter and Facebook), University of Melbourne news emails, and  
56 word of mouth. Interested participants will be contacted by a member of the research team  
57 to discuss the study by telephone. Those eligible will be scheduled to attend the general  
58  
59  
60

1  
2 practice in person where written informed consent is obtained. Women will be excluded from  
3 the initial recruitment until after the preliminary results are obtained from men to permit  
4 refinement of sampling methods.  
5

#### 6 Inclusion and exclusion criteria

7 Men aged 18 years or older will be eligible if they have adequate comprehension to give  
8 informed consent, are able to attend all follow up visits, have an Australian Medicare card  
9 (Australia's national insurance scheme for healthcare) and have received at least 3 doses of  
10 COVID-19 vaccination. Those who have used antibiotics in the 4 weeks prior to the baseline  
11 visit, have widespread mucosal ulcerations by clinical examination, transgender people and  
12 people living with HIV with CD4 counts <250 cells/mm<sup>3</sup> will be excluded.  
13  
14

#### 15 Treatment and allocation

16 Three antibiotic regimens are being evaluated and include those recommended for treating  
17 oropharyngeal NG at the time of the study in Australia or internationally i.e. (a) ceftriaxone  
18 1g<sup>14</sup> (Ceftriaxone-AFT, China) reconstituted in 1% lignocaine (Pfizer, Australia) as a single dose  
19 by intramuscular injection (b) ceftriaxone 500mg reconstituted in 1% lignocaine as a single  
20 dose by intramuscular injection plus 2g oral azithromycin tablet (1g followed by 1g 6-12 hours  
21 later)<sup>18</sup> (Sandoz, Australia) or (c) oral cefixime 400mg<sup>17</sup> capsule as single dose (Denvar, Spain).  
22 The second 1g azithromycin dose will be administered after the 6-hour sample has been taken  
23 (during the first visit) if the participant is not experiencing significant adverse events. If they  
24 are, they will be asked to take the second dose before they go to sleep (approximately 9pm  
25 or 12 hours after the dose).  
26  
27  
28  
29

30  
31 Treatments will not be randomly allocated, rather they will be allocated in batches until the  
32 required sample size is obtained for each regimen, with the first treatment investigated being  
33 ceftriaxone 1g.  
34

#### 35 Reimbursement

36 Each participant will be reimbursed a maximum of AUD1000 for reasonable time and  
37 expenses (food and transport) - AUD500 at the conclusion of the baseline visit and a further  
38 AUD500 at the conclusion of the final in-person visit.  
39  
40

#### 41 Specimen collection and measurements

42 For each participant, antibiotic concentrations will be measured from four oral sites, two oral  
43 fluids and blood. An anorectal swab will also be collected.  
44

45 Specimen collection from participants is summarised below and in Table 1.  
46  
47

48 Oral swabs/curettes specimen collection for PK and PD analysis: (a) tonsils (tonsil and  
49 posterior tonsillar pillar) by swiping both areas three times with a FloqSwab (552c; Copan,  
50 France), (b) from the posterior pharyngeal wall by swiping the site six times with FloqSwab,  
51 and (c) 15 swipes of (i) the buccal mucosa of each cheek and (ii) lateral sides of tongue using  
52 a dermal curette (4mm; Kai Medical, Japan).  
53

54 To minimise the gag reflex, participants are asked to open their mouth wide, inhale and then  
55 gently hold their breath before sampling.  
56  
57

58 Oral fluids specimen collection for PK and PD analysis: All participants are asked to rest their  
59 mouth (no eating, drinking, chewing, smoking etc.) for a minimum of 30 minutes prior to the  
60

1  
2 collection of saliva and GCF. 1mL of saliva will be collected by dribbling into a cup. GCF will be  
3 collected by placing two PerioCol strips (Oraflow, USA) at the central or lateral incisors and  
4 leaving in place for one minute.  
5

6  
7 Blood collection for PK and PD analysis: (a) 5ml of blood will be collected via venepuncture  
8 and plasma obtained by centrifugation at 3500rpm (2500 x g) for 15min (BD Vacutainer 102IU  
9 lithium heparin, ref. 367885), (b) 10µL of finger prick blood will be collected using volumetric  
10 absorptive microsampling (VAMS; Neoteryx Mitra) in duplicate, (c) 10mL of whole blood to  
11 measure baseline blood biochemistry for analysis of renal and liver function (BD Vacutainer  
12 171IU lithium heparin, ref. 367375) and haematocrit (BD Vacutainer 5.4mg EDTA, ref. 367838)  
13 to be used in PK optimisation estimations.  
14  
15

16  
17 Specimen collection to evaluate oral microbiome:

18 Sample will be collected by swabbing the posterior oropharynx, it's side walls and tonsillar  
19 crypts with a total of six swipes using an Eswab (Copan, France).  
20

21  
22 Anorectal swab

23 Anorectal swab will be self-collected by inserting a FloqSwab 5cm into anorectum and  
24 rotating gently for 5 seconds.  
25

26 Collected samples and pH measurements will be taken before (baseline), 2, 4, 6, 24 and 48  
27 hours after the antibiotic dose. Samples taken at baseline to the 6-hour time point will be  
28 taken during the same visit. For the ceftriaxone 500mg plus 2g azithromycin arm, the first  
29 post-dose sample will be taken after the ceftriaxone and first 1g dose of azithromycin. For  
30 ceftriaxone and azithromycin dual therapy, additional samples will be taken at day 7 and 14  
31 days post-dose due to the long half-life of azithromycin (Table 1).  
32  
33

34  
35 Patient and Public Involvement

36 No patient involved. Summary results will be sent to participants who consent to receiving  
37 them.  
38  
39  
40  
41  
42  
43  
44  
45  
46  
47  
48  
49  
50  
51  
52  
53  
54  
55  
56  
57  
58  
59  
60

Table 1 – Summary of sampling frame

| Site      | Sample type<br>(In order of<br>sample<br>collection) | Screening<br>for<br>eligibility | 0h*<br>(Baseline,<br>before dose) | Sampling times (post dose) |     |     |    |    |      |      |       |   |
|-----------|------------------------------------------------------|---------------------------------|-----------------------------------|----------------------------|-----|-----|----|----|------|------|-------|---|
|           |                                                      |                                 |                                   | 1-2h*                      | 4h* | 6h* | d1 | d2 | d3-5 | d7** | d14** |   |
|           | Informed consent                                     | X                               |                                   |                            |     |     |    |    |      |      |       |   |
|           | Baseline survey                                      |                                 |                                   | X                          |     |     |    |    |      |      |       |   |
|           | Follow up surveys                                    |                                 |                                   |                            |     | X   | X  | X  | X    | X    | X     | X |
| Oral      | Saliva flow rate                                     |                                 | X                                 |                            |     |     |    |    |      |      |       |   |
|           | Saliva – pH                                          |                                 | X                                 | X                          | X   | X   | X  | X  |      | X    | X     |   |
|           | pH of buccal mucosa and tongue                       |                                 | X                                 | X                          | X   | X   | X  | X  |      | X    | X     |   |
|           | Saliva – drug                                        |                                 | X                                 | X                          | X   | X   | X  | X  |      | X    | X     |   |
|           | GCF                                                  |                                 | X                                 | X                          | X   | X   | X  | X  |      | X    | X     |   |
|           | Oral swabs (4 sites)                                 |                                 | X                                 | X                          | X   | X   | X  | X  |      | X    | X     |   |
|           | Microbiome                                           |                                 | X                                 | X                          | X   | X   | X  | X  |      | X    | X     |   |
| Bloods    | VAMS                                                 |                                 | X                                 | X                          | X   | X   | X  | X  |      | X    | X     |   |
|           | Blood – Full blood count and biochemistry, LFT       |                                 | X                                 |                            |     |     |    |    |      |      |       |   |
|           | Blood for plasma and whole blood for VAMS            |                                 | X                                 | X                          | X   | X   | X  | X  |      | X    | X     |   |
| Anorectum | Swab for drug level                                  |                                 | X                                 | X                          | X   | X   | X  | X  |      | X    | X     |   |

GCF= gingival crevicular fluid; VAMS=volumetric absorptive microsampling; LFT=liver function test

\*Samples taken at times 0-6h are all taken during the same visit i.e. during the 'day stay'

\*\*day 7 and 14 for ceftriaxone 500mg plus 2g azithromycin arm only

### Participant data

Men's demographics, weight, medical history (smoking status, malabsorption conditions, concurrent medications, STIs and meningococcal vaccination status in the past year), sexual practices, recreational drug use and oral health will be recorded at recruitment. During the follow-up period, men will be asked if they had oral or anal sex prior to each in-person visit and any antibiotic side effects (nausea, vomiting or diarrhoea).

### Adverse events reporting

We do not expect any severe adverse events as these drugs have been widely used for decades and their side-effect profiles are well-established. Daily mobile SMS will be sent to each participant to collect any nausea, vomiting or diarrhoea for 5 days post-dose for all antibiotics, except for participants on ceftriaxone with azithromycin who will receive SMS for 7 days due to the longer half-life of azithromycin.

Study survey data will be collected and managed using REDCap electronic data capture tools hosted at The University of Melbourne.

## ANALYSIS

### Laboratory analysis

#### Specimen analysis

All oral swabs/curettes and PerioCol strips will be placed in 2mL tubes containing 0.5-1mL 100% methanol and stored immediately at -20°C until delivery to the laboratory where they will be stored at -80°C until analysis. Saliva and VAMS will be stored neat in 2mL tubes. Drug concentrations will be estimated using liquid chromatography-mass spectrometry performed to industry standard with pre-established batch acceptance criteria applied to ensure the reliability of the resulting data.<sup>19</sup> Protein unbound (“free”) drug will be measured in plasma and assumed from saliva as only free drug distributes into saliva.

#### pH measurements

The pH of saliva and oral mucosa will be measured as studies have reported increases in some antimicrobial MICs with lowering pH and pH affects the degree of drug ionisation and penetration into cells.<sup>11</sup> All participants will be asked to rest their mouth for at least 30 minutes prior to saliva and oral mucosal pH measurements.

Saliva pH will be measured by a drop of saliva into the Lacquatwin pH meter (pH22, Horiba, USA). The surface pH of the side of the tongue and buccal mucosa will be measured by placing a Hanna flat head meter (HI99171; USA) against the oral mucosal surface as per previous methods.<sup>20</sup>

Specimens collected for saliva flow rate: At baseline, after resting the mouth for at least 30 minutes, saliva will be collected into a cup over 1 minute and then the volume collected measured (mL/min).

#### Sample size estimation

We have used optimal sampling design (OSD) methodologies using published PK data to determine the number of subjects and the number and timing of samples needed for each drug to provide sufficiently precise estimates of the PK model parameters. Our calculations were based on the number needed for measuring PK in blood samples because there are no published data available for tissue samples at our infection sites. Using OSD methods and taking into consideration recruitment challenges due to the requirement for intensive sampling among healthy volunteers and COVID-19 restrictions, up to 20 people per drug is considered sufficient and in line with previous PK studies in the mouth.<sup>21</sup>

#### Pharmacokinetic analysis

Nonlinear mixed-effects modelling will be performed using the FOCE+I algorithm in the NONMEM software. For each drug the plasma concentration-time profiles will be modelled first. One-, two- and three-compartment models will be evaluated, with linear, saturable or mixed-order elimination. To describe absorption, first- and zero-order, simultaneous or sequential first- and zero-order processes will be tested. Profiles in saliva and oral swabs/curettes will be subsequently included. An MC-PEM algorithm, minimal physiologically-based PK modelling approach<sup>22</sup> and/or three-stage hierarchical Bayesian method may be considered as needed.<sup>23</sup> Inter-individual variability for the population PK parameters will be estimated where possible. Individual (posthoc) PK parameter estimates will be graphed against biological subject characteristics (e.g. weight, creatinine clearance)



1  
2 for initial exploration of potential covariate relationships. Covariates will be formally  
3 evaluated by forward inclusion followed by backwards elimination. Model selection will be  
4 based on goodness-of-fit plots, visual predictive checks, the normalised prediction  
5 distribution error, the log-likelihood ratio test (for nested models; Akaike information  
6 criterion for non-nested models) and biological plausibility. For each drug, the C<sub>max</sub>, T<sub>max</sub>,  
7 elimination half-lives and AUC (AUC<sub>0-24</sub>, AUC<sub>0-∞</sub>) will be calculated from the individual  
8 estimated PK parameters or read from the individual fitted PK profiles. For the PK/PD indices,  
9 the magnitude of %fT>MIC will be estimated for ceftriaxone and cefixime. The magnitudes of  
10 fAUC/MIC and fC<sub>max</sub>/MIC will be estimated for azithromycin. The NG MICs used for PK/PD  
11 target attainment of ceftriaxone and cefixime will be 0.002, 0.004, 0.008, 0.015, 0.03, 0.06,  
12 0.125, 0.25, 0.5, 1.0 and 2.0mg/L. NG MICs used for azithromycin will be 0.125, 0.25, 0.5, 1.0,  
13 2.0, 4.0 and 8.0 mg/L.  
14  
15  
16  
17

### 18 Microbiome analysis

19 Microbiome analysis will be used to understand the impact of antibiotics on oral microbiota  
20 and to examine any associations with drug concentrations since human gut biota has been  
21 shown to modulate the efficacy of drugs.<sup>24</sup>

22 Microbiome analysis will be undertaken as previously described.<sup>25</sup> DNA will be extracted from  
23 tonsillar samples using the QIASymphony PowerFecal Pro kit (Qiagen). Extracted DNA will be  
24 used to generate an amplicon-based library using primers that amplify the V4 region of the  
25 16S rRNA gene: 515F (59-GTGYCAGCMGCCGCGGTAA-39) and 806R (59-  
26 GGACTACNVGGGTWTCTAAT-39). Libraries (biological samples, as well as positive and  
27 negative controls) will be sequenced on an Illumina MiSeq instrument (Illumina, San Diego,  
28 CA, USA) with a 2 by 150 bp run through Doherty Applied Microbial Genomics at The Peter  
29 Doherty Institute for Infection and Immunity, University of Melbourne.  
30  
31  
32  
33

34 Demultiplexing and trimming of sequencing reads will be conducted using the online tool  
35 Qiita (<https://qiita.ucsd.edu>). Reads will be demultiplexed using split libraries FASTQ and  
36 trimmed to 150 bp (Version QIIMEq2 1.9.1). DADA2 v1.16.0 will be used to quality-filter the  
37 sequence data, infer amplicon sequence variants (ASVs), and remove chimeras. DADA2 and a  
38 DADA2 formatted version of the Silva reference database (v138) will be used to assign  
39 taxonomy down to the genus level. We will visually compare the oropharyngeal microbiota  
40 composition at weeks 0, 1 and 2 by principal component analysis (PCA) of center-log ratio-  
41 transformed ASV level sequence data, using mixOmics (v6.12.1). PERMANOVA based on the  
42 Bray-Curtis distance will be used to test for differences in the overall structure of the  
43 oropharyngeal microbiota. Bacterial diversity will be calculated on ASV data using the  
44 Shannon diversity index using vegan v2.5-7. Changes in bacterial diversity following treatment  
45 will be used to assess using the Wilcoxon signed-rank test. We will investigate differences in  
46 the baseline oropharyngeal microbiota composition between individuals with and without  
47 specific characteristics/factors collected in the baseline survey.  
48  
49  
50  
51

### 52 **ETHICS AND DISSEMINATION**

#### 53 Ethics approval

54 This study was approved by Royal Melbourne Hospital Human Research Ethics Committee  
55 (60370/MH-2021). The study is based on voluntary participation and a written informed  
56 consent process.  
57  
58  
59  
60

### Clinical trial registration

The study is registered with the Australian drug regulator, The Therapeutic Goods Administration (Clinical Trial Notification CT20006 CT-2021-CTN-00571-1 V2) and with the Australian New Zealand Clinical Trials Registry (Trial ID ACTRN12621000339853)

### Dissemination plans

The study results will be submitted for publication in peer-reviewed journals and reported at national and international conferences. These data will be used to inform other drug optimisation studies or modelling to prevent NG AMR. Summary results will be sent to participants who consent to receiving them. All data relevant to the study will be included in the article or uploaded as supplementary information.

## **DISCUSSION**

Treatment options for gonorrhoea are diminishing as NG becomes increasingly resistant – particularly at the oropharyngeal site. The primary objectives of STI treatment are to maximize cure, minimize drug toxicity and avoid induction or selection of AMR. Knowledge of the PK characteristics of drugs can guide development of treatment regimens. Simply measuring the concentrations in tissue and blood as is done in most trials of new NG treatment, is not enough. This trial will generate the most comprehensive PK data available today from four oral sites, two oral fluids and blood. It will also estimate PK/PD target achievements based on the PK data and model. It will do this by using new and validated methods including the use of blood VAMS, which will allow bloods to be taken in the home setting. The data and methods will inform optimisation of drugs in phase 2 or 3 RCTs and Hollow Fibre Infection Models.<sup>26 27</sup>

Oropharyngeal NG is a major driver of ongoing transmission, contributing to 50% of new NG infections in the anorectum through saliva in some settings<sup>28</sup> and it can cause serious reproductive sequelae (e.g.: pelvic inflammatory disease) by being passed to female genitalia via oral sex.<sup>29</sup> As concerns for global AMR increases with few antimicrobials for STIs in development,<sup>30</sup> clinicians have little choice but to maximize the use of currently available treatments. One approach is to optimise currently available antibiotics, but this requires an understanding of the PK of these drugs in the target population, including their distribution to the site of infection. Only drug that is unbound to protein (“free” drug) is pharmacologically active so measuring this is critical.

Even though a drug reaches adequate concentrations in tissue, this does not always translate to clinical efficacy,<sup>31</sup> because the drug needs to be in a suitable form (i.e. unionized rather than ionized form) to penetrate across cell walls to kill the bacteria – and this is directly affected by the environmental pH. Our trial will provide the first comprehensive pH data for the mouth and effects on drug PK. Lower pHs have been shown to increase the MIC for some drugs used to treat STIs.<sup>32</sup> In the first and only rectal azithromycin PK study, we also found that raising the gut pH by taking an acid lowering drug (esomeprazole) was associated with at least a 10-fold higher azithromycin tissue concentrations compared with those not taking this drug.<sup>33</sup> This is a highly relevant finding, as a previous study suggested higher azithromycin concentrations may be needed in anorectal tissue, as there was a 4-fold higher MIC for *Chlamydia trachomatis* in anorectal compared to vaginal tissue.<sup>34</sup> Similarly, the MICs of

1  
2 azithromycin and ceftriaxone in NG isolates cultured from oropharynx were 1.6-1.8 times  
3 higher than in the NG isolates obtained from the urogenital tract.<sup>35</sup>  
4

5 Applying PK data to predict an antibiotic's effectiveness i.e. its PD, varies between different  
6 classes of antibiotics and remains unclear at the oropharyngeal site. For some, the  $fT>MIC$  is  
7 considered to be more important (e.g. for beta-lactams including cephalosporins), while for  
8 other antibiotics (e.g. macrolides) the overall drug exposure (AUC) relative to MIC ( $fAUC/MIC$   
9 ratio) is considered more predictive.<sup>36</sup> One recommendation about using PK/PD indices for  
10 predicting outcome has been published from the US Centers for Disease Control and  
11 Prevention who states that for effective NG treatment, the serum concentration should be  
12 at least 4x the MIC, for at least 10 hours after reaching its peak concentration.<sup>37</sup> However this  
13 is based on data from 1964 using penicillin to treat urethral NG<sup>38</sup> and is therefore of limited  
14 applicability to non-penicillin treatments or infections at non-urogenital sites. For the oral  
15 space, available PK data are limited to small studies in tonsils and saliva. In addition to saliva,  
16 drug concentrations in GCF may play a role in efficacy. GCF plays a role in the progression of  
17 inflammatory oral diseases<sup>39</sup> which may impact oral infections and antibiotics such as  
18 azithromycin have been shown to reduce GCF volume.<sup>40</sup> Limited PK data in the oropharynx or  
19 oral cavity has major limitations since we do not yet know where NG replicates in the oral  
20 space and therefore where antibiotics need to be delivered to kill NG. Therefore,  
21 understanding if an antibiotic distributes widely in oral tissue is critical.  
22  
23  
24  
25  
26  
27  
28

29 This trial does have some limitations that must be considered when interpreting the results.  
30 Our sample is limited to males with transgender and females excluded. Additionally, because  
31 of trial logistics, we had to exclude those with oropharyngeal gonorrhoea and because of this,  
32 we are unable to generate PD data as there are no bacterial outcomes in the volunteers.  
33 Additionally, we do not have true tissue samples (e.g. from biopsies) but rather swabs of  
34 surface mucosa, this will still allow examination of drug distribution by oral cell type, for an  
35 infection that is primarily at the epithelial surface.  
36  
37  
38

39 In conclusion, comprehensive PK data on treatments to cure oropharyngeal NG are essential  
40 if we are to maintain their effectiveness through drug optimisation when few new drugs will  
41 reach the market in the near future. Equally, methods to collect and analyse antibiotic  
42 concentrations in oral mucosal surfaces, tissue and fluids are essential to be able to apply  
43 these methods to emerging treatment in pre-marketing trials to ensure drugs in the pipeline  
44 will be effective at both oropharyngeal and anogenital sites.  
45  
46  
47  
48

49 **Acknowledgments:** Not applicable  
50

51 **Contributors:** FSYK conceived and designed the original protocol with inputs from MU and  
52 JSH. MU and DAW revised the section on the microbiological and microbiota methods. NL  
53 and SHL revised the section on the recruitment and data collection. JAR, SLP and CBL revised  
54 the pharmacokinetic analysis section. SCW revised the laboratory analysis section. TY  
55 revised the specimen collection section for oral specimens and fluids. CKF, EPFC and DAL  
56 revised the section on anorectal sampling. MAH led the design of the data collection tools.  
57 FYSK and JSH wrote the first draft of the study protocol with all authors contributing to  
58 subsequent revisions and approved the protocol prior to submission.  
59  
60

1  
2  
3 **Funding:** This project is funded by the Australian National Health and Medical Research  
4 Council (NHMRC grant number APP1181057). J.A. Roberts received funding from the NHMRC  
5 for a Centre of Research Excellence (APP2007007) and an Investigator Grant (APP2009736) as  
6 well as an Advancing Queensland Clinical Fellowship. EPFC is supported by an NHMRC  
7 Emerging Leadership Investigator Grant (GNT1172873).  
8  
9

10 **Competing interests:** The authors declare that they have no competing interests.  
11  
12

13 **Patient consent for publication:** Not applicable.  
14  
15  
16  
17  
18  
19  
20  
21  
22  
23  
24  
25  
26  
27  
28  
29  
30  
31  
32  
33  
34  
35  
36  
37  
38  
39  
40  
41  
42  
43  
44  
45  
46  
47  
48  
49  
50  
51  
52  
53  
54  
55  
56  
57  
58  
59  
60

For peer review only

## References

1. World Health Organisation. Global progress report on HIV, viral hepatitis and sexually transmitted infections, 2021. Accountability for the global health sector strategies 2016–2021: actions for impact., 2021.
2. National Notifiable Diseases Surveillance System. Number of notifications of Gonococcal infections, Australia, by age group and sex. 2021.
3. Centers for Disease Control and Prevention. Sexually Transmitted Disease Surveillance 2017 report. In: Atlanta: U.S : Department of Health and Human Services, ed., 2017.
4. Public Health England (PHE). Sexually transmitted infections and screening for chlamydia in England, 2018. 2019;13(19)
5. Chan PA, Robinette A, Montgomery M, et al. Extragenital Infections Caused by Chlamydia trachomatis and Neisseria gonorrhoeae: A Review of the Literature. *Infect Dis Obstet Gynecol* 2016;2016:5758387. doi: 10.1155/2016/5758387
6. Moran JS. Treating Uncomplicated Neisseria gonorrhoeae Infections: Is the Anatomic Site of Infection Important? *Sex Transm Dis* 1995;22(1):39-47. doi: 10.1097/00007435-199501000-00007
7. Fairley CK, Cornelisse VJ, Hocking JS, et al. Models of gonorrhoea transmission from the mouth and saliva. *Lancet Infect Dis* 2019;19(10):360-66. doi: 10.1016/s1473-3099(19)30304-4
8. Unemo M, Shafer WM. Antimicrobial resistance in Neisseria gonorrhoeae in the 21st century: past, evolution, and future. *Clin Microbiol Rev* 2014;27(3):587-613. doi: 10.1128/CMR.00010-14 [published Online First: 2014/07/02]
9. Unemo M, Lahra MM, Escher M, et al. WHO global antimicrobial resistance surveillance for Neisseria gonorrhoeae 2017–18: a retrospective observational study. *The Lancet Microbe* 2021;2(11):e627-e36. doi: 10.1016/s2666-5247(21)00171-3
10. World Health Organisation. Global Priority List of Antibiotic-Resistant Bacteria to Guide Research, Discovery, and Development of New Antibiotics. : WHO; Geneva, Switzerland, 2017.
11. Kong FYS, Horner P, Unemo M, et al. Pharmacokinetic considerations regarding the treatment of bacterial sexually transmitted infections with azithromycin: a review. *J Antimicrob Chemother* 2019;74(5):1157-66. doi: 10.1093/jac/dky548
12. Alirol E, Wi TE, Bala M, et al. Multidrug-resistant gonorrhoea: A research and development roadmap to discover new medicines. *PLOS Medicine* 2017;14(7):e1002366. doi: 10.1371/journal.pmed.1002366
13. Kong FYS, Hatzis CL, Lau A, et al. Treatment efficacy for pharyngeal Neisseria gonorrhoeae: a systematic review and meta-analysis of randomized controlled trials. *J Antimicrob Chemother* 2020;75(11):3109-19. doi: 10.1093/jac/dkaa300
14. Fifer H, Saunders J, Soni S, et al. 2018 UK national guideline for the management of infection with Neisseria gonorrhoeae. *Int J STD AIDS* 2020;31(1):4-15. doi: 10.1177/0956462419886775 [published Online First: 2019/12/25]
15. Australian Sexual Health Alliance. Australian STI management guidelines for use in primary care 2021
16. Workowski KA, Bolan GA. Sexually Transmitted Diseases Treatment Guidelines, 2015. *MMWR Recomm Rep* 2015;64(RR-03):1-138.
17. World Health Organisation. WHO guidelines for the treatment of Neisseria gonorrhoeae, 2016.
18. Unemo M, Ross J, Serwin AB, et al. 2020 European guideline for the diagnosis and treatment of gonorrhoea in adults. *Int J STD AIDS* 2020:956462420949126. doi: 10.1177/0956462420949126
19. Naicker S, Guerra Valero YC, Ordenez Meija JL, et al. A UHPLC-MS/MS method for the simultaneous determination of piperacillin and tazobactam in plasma (total and unbound), urine and renal replacement therapy effluent. *J Pharm Biomed Anal* 2018;148:324-33. doi: 10.1016/j.jpba.2017.10.023
20. Yosipovitch G, Kaplan I, Calderon S, et al. Distribution of Mucosal pH on the Bucca, Tongue, Lips and Palate. Study in Healthy Volunteers and Patients with Lichen Planus, Behçet's Disease

- and Burning Mouth Syndrome. *Acta dermato-venereologica* 2001;81(3):178-80. doi: 10.1080/000155501750376258
21. Barbee LA, Nayak SU, Blumer JL, et al. A Phase 1 Pharmacokinetic and Safety Study of Extended-Duration, High-dose Cefixime for Cephalosporin-resistant *Neisseria gonorrhoeae* in the Pharynx. *Sex Transm Dis* 2018;45(10):677-83. doi: 10.1097/OLQ.0000000000000844
22. Cao Y, Jusko WJ. Applications of minimal physiologically-based pharmacokinetic models. *J Pharmacokinet Pharmacodyn* 2012;39(6):711-23. doi: 10.1007/s10928-012-9280-2
23. Landersdorfer CB, Bulitta JB, Kinzig M, et al. Penetration of antibacterials into bone: Pharmacokinetic, pharmacodynamic and bioanalytical considerations. *Clin Pharmacokinet* 2009;48(2):89-124. doi: 10.2165/00003088-200948020-00002
24. Klunemann M, Andrejev S, Blasche S, et al. Bioaccumulation of therapeutic drugs by human gut bacteria. *Nature* 2021;597(7877):533-38. doi: 10.1038/s41586-021-03891-8
25. Plummer EL, Maddaford K, Murray GL, et al. The Impact of Mouthwash on the Oropharyngeal Microbiota of Men Who Have Sex with Men: a Substudy of the OMEGA Trial. *Microbiology spectrum* 2022;10(1):e01757-21. doi: <https://doi.org/10.1128/spectrum.01757-2>
26. Jacobsson S, Golparian D, Oxelbark J, et al. Pharmacodynamic Evaluation of Dosing, Bacterial Kill, and Resistance Suppression for Zoliflodacin Against *Neisseria gonorrhoeae* in a Dynamic Hollow Fiber Infection Model. *Front Pharmacol* 2021;12:682135. doi: 10.3389/fphar.2021.682135
27. Jacobsson S, Golparian D, Oxelbark J, et al. Pharmacodynamic Evaluation of Zoliflodacin Treatment of *Neisseria gonorrhoeae* Strains With Amino Acid Substitutions in the Zoliflodacin Target GyrB Using a Dynamic Hollow Fiber Infection Model. *Front Pharmacol* 2022;13:874176. doi: 10.3389/fphar.2022.874176
28. Chow EPF, Cornelisse VJ, Read TRH, et al. Saliva use as a lubricant for anal sex is a risk factor for rectal gonorrhoea among men who have sex with men, a new public health message: a cross-sectional survey. *Sex Transm Infect* 2016;92:532-36. doi: 10.1136/sextrans-2015-052502
29. Lau A, Kong FYS, Huston W, et al. Factors associated with anorectal *Chlamydia trachomatis* or *Neisseria gonorrhoeae* test positivity in women – a systematic review and meta-analysis. *Sex Transm Infect*. 2019 Aug;95(5):361-367. doi: 10.1136/sextrans-2018-05395
30. World Health Organisation. Antimicrobial resistance: global report on surveillance, 2014.
31. Mouton JW, Theuretzbacher U, Craig WA, et al. Tissue concentrations: do we ever learn? *J Antimicrob Chemother* 2008;61(2):235-37. doi: 10.1093/jac/dkm476
32. Barcia-Macay M, Seral C, Mingeot-Leclercq MP, et al. Pharmacodynamic evaluation of the intracellular activities of antibiotics against *Staphylococcus aureus* in a model of THP-1 macrophages. *Antimicrob Agents Chemother* 2006;50(3):841-51. doi: 10.1128/AAC.50.3.841-851.2006
33. Kong FYS, Rupasinghe TW, Simpson JA, et al. Pharmacokinetics of a single 1g dose of azithromycin in rectal tissue in men. *Plos One* 2017;12(3):e0174372. doi: 10.1371/journal.pone.0174372
34. Foschi C, Salvo M, Cevenini R, et al. *Chlamydia trachomatis* antimicrobial susceptibility in colorectal and endocervical cells. *J Antimicrob Chemother* 2018;73(2):409-13. doi: 10.1093/jac/dkx392
35. Cole MJ, Tan W, Fifer H, et al. Gentamicin, azithromycin and ceftriaxone in the treatment of gonorrhoea: the relationship between antibiotic MIC and clinical outcome. *J Antimicrob Chemother* 2019;75(2):449-57. doi: 10.1093/jac/dkz436
36. Ambrose PG, Bhavnani SM, Rubino CM, et al. Pharmacokinetics-Pharmacodynamics of Antimicrobial Therapy: It's Not Just for Mice Anymore. *Clin Infect Dis* 2007;44(1):79-86. doi: 10.1086/510079
37. Newman LM, Moran JS, Workowski KA. Update on the Management of Gonorrhoea in Adults in the United States. *Clin Infect Dis* 2007;44(Supplement\_3):S84-S101. doi: 10.1086/511422

- 1  
2 38. Jaffe HW, Schroeter AL, Reynolds GH, et al. Pharmacokinetic determinants of penicillin cure of  
3 gonococcal urethritis. *Antimicrob Agents Chemother* 1979;15(4):587-91. doi:  
4 10.1128/AAC.15.4.58  
5 39. Subbarao KC, Nattuthurai GS, Sundararajan SK, et al. Gingival Crevicular Fluid: An Overview. *J*  
6 *Pharm Bioallied Sci* 2019;11(Suppl 2):S135-S39. doi: 10.4103/JPBS.JPBS\_56\_19  
7 40. Ho W, Eubank T, Leblebicioglu B, et al. Azithromycin decreases crevicular fluid volume and  
8 mediator content. *J Dent Res* 2010;89(8):831-5. doi: 10.1177/0022034510368650  
9

10  
11  
12  
13  
14  
15  
16  
17  
18  
19  
20  
21  
22  
23  
24  
25  
26  
27  
28  
29  
30  
31  
32  
33  
34  
35  
36  
37  
38  
39  
40  
41  
42  
43  
44  
45  
46  
47  
48  
49  
50  
51  
52  
53  
54  
55  
56  
57  
58  
59  
60

For peer review only

# Reporting checklist for protocol of a clinical trial.

Based on the SPIRIT guidelines.

## Instructions to authors

Complete this checklist by entering the page numbers from your manuscript where readers will find each of the items listed below.

Your article may not currently address all the items on the checklist. Please modify your text to include the missing information. If you are certain that an item does not apply, please write "n/a" and provide a short explanation.

Upload your completed checklist as an extra file when you submit to a journal.

In your methods section, say that you used the SPIRIT reporting guidelines, and cite them as:

Chan A-W, Tetzlaff JM, Gøtzsche PC, Altman DG, Mann H, Berlin J, Dickersin K, Hróbjartsson A, Schulz KF, Parulekar WR, Krleža-Jerić K, Laupacis A, Moher D. SPIRIT 2013 Explanation and Elaboration: Guidance for protocols of clinical trials. *BMJ*. 2013;346:e7586

|                                   | Reporting Item                                                                                                                  | Page Number |
|-----------------------------------|---------------------------------------------------------------------------------------------------------------------------------|-------------|
| <b>Administrative information</b> |                                                                                                                                 |             |
| Title                             | <a href="#">#1</a> Descriptive title identifying the study design, population, interventions, and, if applicable, trial acronym | 1           |
| Trial registration                | <a href="#">#2a</a> Trial identifier and registry name. If not yet                                                              | 2,11        |



|    |                     |                                                                     |                     |
|----|---------------------|---------------------------------------------------------------------|---------------------|
| 1  |                     | registered, name of intended registry                               |                     |
| 2  |                     |                                                                     |                     |
| 3  |                     |                                                                     |                     |
| 4  | Trial registration: | <a href="#">#2b</a> All items from the World Health Organization    | NA                  |
| 5  |                     |                                                                     |                     |
| 6  | data set            | Trial Registration Data Set                                         |                     |
| 7  |                     |                                                                     |                     |
| 8  |                     |                                                                     |                     |
| 9  | Protocol version    | <a href="#">#3</a> Date and version identifier                      | NA – only 1 version |
| 10 |                     |                                                                     |                     |
| 11 |                     |                                                                     | published           |
| 12 |                     |                                                                     |                     |
| 13 |                     |                                                                     |                     |
| 14 | Funding             | <a href="#">#4</a> Sources and types of financial, material, and    | 12                  |
| 15 |                     | other support                                                       |                     |
| 16 |                     |                                                                     |                     |
| 17 |                     |                                                                     |                     |
| 18 |                     |                                                                     |                     |
| 19 | Roles and           | <a href="#">#5a</a> Names, affiliations, and roles of protocol      | 1,12                |
| 20 |                     |                                                                     |                     |
| 21 | responsibilities:   | contributors                                                        |                     |
| 22 |                     |                                                                     |                     |
| 23 | contributorship     |                                                                     |                     |
| 24 |                     |                                                                     |                     |
| 25 |                     |                                                                     |                     |
| 26 |                     |                                                                     |                     |
| 27 | Roles and           | <a href="#">#5b</a> Name and contact information for the trial      | 1                   |
| 28 |                     |                                                                     |                     |
| 29 | responsibilities:   | sponsor                                                             |                     |
| 30 |                     |                                                                     |                     |
| 31 | sponsor contact     |                                                                     |                     |
| 32 |                     |                                                                     |                     |
| 33 | information         |                                                                     |                     |
| 34 |                     |                                                                     |                     |
| 35 |                     |                                                                     |                     |
| 36 |                     |                                                                     |                     |
| 37 | Roles and           | <a href="#">#5c</a> Role of study sponsor and funders, if any, in   | 12                  |
| 38 |                     |                                                                     |                     |
| 39 | responsibilities:   | study design; collection, management, analysis,                     |                     |
| 40 |                     |                                                                     |                     |
| 41 | sponsor and funder  | and interpretation of data; writing of the report;                  |                     |
| 42 |                     |                                                                     |                     |
| 43 |                     |                                                                     |                     |
| 44 |                     | and the decision to submit the report for                           |                     |
| 45 |                     |                                                                     |                     |
| 46 |                     | publication, including whether they will have                       |                     |
| 47 |                     |                                                                     |                     |
| 48 |                     | ultimate authority over any of these activities                     |                     |
| 49 |                     |                                                                     |                     |
| 50 |                     |                                                                     |                     |
| 51 | Roles and           | <a href="#">#5d</a> Composition, roles, and responsibilities of the | NA – no steering    |
| 52 |                     |                                                                     |                     |
| 53 | responsibilities:   | coordinating centre, steering committee,                            | committees etc      |
| 54 |                     |                                                                     |                     |
| 55 | committees          | endpoint adjudication committee, data                               |                     |
| 56 |                     |                                                                     |                     |
| 57 |                     |                                                                     |                     |
| 58 |                     |                                                                     |                     |
| 59 |                     |                                                                     |                     |
| 60 |                     |                                                                     |                     |

management team, and other individuals or groups overseeing the trial, if applicable (see Item 21a for data monitoring committee)

## Introduction

|    |                           |                     |                                                                                                                                                                                                            |     |
|----|---------------------------|---------------------|------------------------------------------------------------------------------------------------------------------------------------------------------------------------------------------------------------|-----|
| 11 | Background and            | <a href="#">#6a</a> | Description of research question and justification for undertaking the trial, including summary of relevant studies (published and unpublished) examining benefits and harms for each intervention         | 4,5 |
| 12 | rationale                 |                     |                                                                                                                                                                                                            |     |
| 13 |                           |                     |                                                                                                                                                                                                            |     |
| 14 |                           |                     |                                                                                                                                                                                                            |     |
| 15 |                           |                     |                                                                                                                                                                                                            |     |
| 16 |                           |                     |                                                                                                                                                                                                            |     |
| 17 |                           |                     |                                                                                                                                                                                                            |     |
| 18 |                           |                     |                                                                                                                                                                                                            |     |
| 19 |                           |                     |                                                                                                                                                                                                            |     |
| 20 |                           |                     |                                                                                                                                                                                                            |     |
| 21 |                           |                     |                                                                                                                                                                                                            |     |
| 22 |                           |                     |                                                                                                                                                                                                            |     |
| 23 | Background and            | <a href="#">#6b</a> | Explanation for choice of comparators                                                                                                                                                                      | 6   |
| 24 | rationale: choice of      |                     |                                                                                                                                                                                                            |     |
| 25 | comparators               |                     |                                                                                                                                                                                                            |     |
| 26 |                           |                     |                                                                                                                                                                                                            |     |
| 27 |                           |                     |                                                                                                                                                                                                            |     |
| 28 |                           |                     |                                                                                                                                                                                                            |     |
| 29 |                           |                     |                                                                                                                                                                                                            |     |
| 30 |                           |                     |                                                                                                                                                                                                            |     |
| 31 | Objectives                | <a href="#">#7</a>  | Specific objectives or hypotheses                                                                                                                                                                          | 4,5 |
| 32 |                           |                     |                                                                                                                                                                                                            |     |
| 33 |                           |                     |                                                                                                                                                                                                            |     |
| 34 | Trial design              | <a href="#">#8</a>  | Description of trial design including type of trial (eg, parallel group, crossover, factorial, single group), allocation ratio, and framework (eg, superiority, equivalence, non-inferiority, exploratory) | 5   |
| 35 |                           |                     |                                                                                                                                                                                                            |     |
| 36 |                           |                     |                                                                                                                                                                                                            |     |
| 37 |                           |                     |                                                                                                                                                                                                            |     |
| 38 |                           |                     |                                                                                                                                                                                                            |     |
| 39 |                           |                     |                                                                                                                                                                                                            |     |
| 40 |                           |                     |                                                                                                                                                                                                            |     |
| 41 |                           |                     |                                                                                                                                                                                                            |     |
| 42 |                           |                     |                                                                                                                                                                                                            |     |
| 43 |                           |                     |                                                                                                                                                                                                            |     |
| 44 |                           |                     |                                                                                                                                                                                                            |     |
| 45 |                           |                     |                                                                                                                                                                                                            |     |
| 46 | <b>Methods:</b>           |                     |                                                                                                                                                                                                            |     |
| 47 |                           |                     |                                                                                                                                                                                                            |     |
| 48 | <b>Participants,</b>      |                     |                                                                                                                                                                                                            |     |
| 49 | <b>interventions, and</b> |                     |                                                                                                                                                                                                            |     |
| 50 |                           |                     |                                                                                                                                                                                                            |     |
| 51 | <b>outcomes</b>           |                     |                                                                                                                                                                                                            |     |
| 52 |                           |                     |                                                                                                                                                                                                            |     |
| 53 |                           |                     |                                                                                                                                                                                                            |     |
| 54 |                           |                     |                                                                                                                                                                                                            |     |
| 55 |                           |                     |                                                                                                                                                                                                            |     |
| 56 | Study setting             | <a href="#">#9</a>  | Description of study settings (eg, community                                                                                                                                                               | 5   |
| 57 |                           |                     |                                                                                                                                                                                                            |     |
| 58 |                           |                     |                                                                                                                                                                                                            |     |
| 59 |                           |                     |                                                                                                                                                                                                            |     |
| 60 |                           |                     |                                                                                                                                                                                                            |     |

|    |                      |                                                                          |                       |
|----|----------------------|--------------------------------------------------------------------------|-----------------------|
| 1  |                      | clinic, academic hospital) and list of countries                         |                       |
| 2  |                      | where data will be collected. Reference to where                         |                       |
| 3  |                      | list of study sites can be obtained                                      |                       |
| 4  |                      |                                                                          |                       |
| 5  |                      |                                                                          |                       |
| 6  |                      |                                                                          |                       |
| 7  |                      |                                                                          |                       |
| 8  | Eligibility criteria | <a href="#">#10</a> Inclusion and exclusion criteria for participants.   | 5,6                   |
| 9  |                      |                                                                          |                       |
| 10 |                      | If applicable, eligibility criteria for study centres                    |                       |
| 11 |                      | and individuals who will perform the                                     |                       |
| 12 |                      | interventions (eg, surgeons, psychotherapists)                           |                       |
| 13 |                      |                                                                          |                       |
| 14 |                      |                                                                          |                       |
| 15 |                      |                                                                          |                       |
| 16 |                      |                                                                          |                       |
| 17 |                      |                                                                          |                       |
| 18 | Interventions:       | <a href="#">#11a</a> Interventions for each group with sufficient detail | 6                     |
| 19 |                      |                                                                          |                       |
| 20 | description          | to allow replication, including how and when                             |                       |
| 21 |                      | they will be administered                                                |                       |
| 22 |                      |                                                                          |                       |
| 23 |                      |                                                                          |                       |
| 24 |                      |                                                                          |                       |
| 25 |                      |                                                                          |                       |
| 26 | Interventions:       | <a href="#">#11b</a> Criteria for discontinuing or modifying allocated   | NA – participants are |
| 27 |                      |                                                                          |                       |
| 28 | modifications        | interventions for a given trial participant (eg,                         | given single dose of  |
| 29 |                      | drug dose change in response to harms,                                   | drug so cannot be     |
| 30 |                      | participant request, or improving / worsening                            | changed once given.   |
| 31 |                      | disease)                                                                 |                       |
| 32 |                      |                                                                          |                       |
| 33 |                      |                                                                          |                       |
| 34 |                      |                                                                          |                       |
| 35 |                      |                                                                          |                       |
| 36 |                      |                                                                          |                       |
| 37 |                      |                                                                          |                       |
| 38 | Interventions:       | <a href="#">#11c</a> Strategies to improve adherence to intervention     | NA – single dose      |
| 39 |                      |                                                                          |                       |
| 40 | adherence            | protocols, and any procedures for monitoring                             | treatments            |
| 41 |                      | adherence (eg, drug tablet return; laboratory                            |                       |
| 42 |                      | tests)                                                                   |                       |
| 43 |                      |                                                                          |                       |
| 44 |                      |                                                                          |                       |
| 45 |                      |                                                                          |                       |
| 46 |                      |                                                                          |                       |
| 47 |                      |                                                                          |                       |
| 48 | Interventions:       | <a href="#">#11d</a> Relevant concomitant care and interventions         | 5,6                   |
| 49 |                      |                                                                          |                       |
| 50 | concomitant care     | that are permitted or prohibited during the trial                        |                       |
| 51 |                      |                                                                          |                       |
| 52 |                      |                                                                          |                       |
| 53 | Outcomes             | <a href="#">#12</a> Primary, secondary, and other outcomes,              | 5                     |
| 54 |                      |                                                                          |                       |
| 55 |                      | including the specific measurement variable (eg,                         |                       |
| 56 |                      | systolic blood pressure), analysis metric (eg,                           |                       |
| 57 |                      |                                                                          |                       |
| 58 |                      |                                                                          |                       |
| 59 |                      |                                                                          |                       |
| 60 |                      |                                                                          |                       |

|    |                           |                                                                   |                  |
|----|---------------------------|-------------------------------------------------------------------|------------------|
| 1  |                           | change from baseline, final value, time to event),                |                  |
| 2  |                           | method of aggregation (eg, median, proportion),                   |                  |
| 3  |                           | and time point for each outcome. Explanation of                   |                  |
| 4  |                           | the clinical relevance of chosen efficacy and                     |                  |
| 5  |                           | harm outcomes is strongly recommended                             |                  |
| 6  |                           |                                                                   |                  |
| 7  |                           |                                                                   |                  |
| 8  |                           |                                                                   |                  |
| 9  |                           |                                                                   |                  |
| 10 |                           |                                                                   |                  |
| 11 |                           |                                                                   |                  |
| 12 | Participant timeline      | <a href="#">#13</a> Time schedule of enrolment, interventions     | 5,8              |
| 13 |                           | (including any run-ins and washouts),                             |                  |
| 14 |                           | assessments, and visits for participants. A                       |                  |
| 15 |                           | schematic diagram is highly recommended (see                      |                  |
| 16 |                           | Figure)                                                           |                  |
| 17 |                           |                                                                   |                  |
| 18 |                           |                                                                   |                  |
| 19 |                           |                                                                   |                  |
| 20 |                           |                                                                   |                  |
| 21 |                           |                                                                   |                  |
| 22 |                           |                                                                   |                  |
| 23 |                           |                                                                   |                  |
| 24 | Sample size               | <a href="#">#14</a> Estimated number of participants needed to    | 9                |
| 25 |                           | achieve study objectives and how it was                           |                  |
| 26 |                           | determined, including clinical and statistical                    |                  |
| 27 |                           | assumptions supporting any sample size                            |                  |
| 28 |                           | calculations                                                      |                  |
| 29 |                           |                                                                   |                  |
| 30 |                           |                                                                   |                  |
| 31 |                           |                                                                   |                  |
| 32 |                           |                                                                   |                  |
| 33 |                           |                                                                   |                  |
| 34 |                           |                                                                   |                  |
| 35 |                           |                                                                   |                  |
| 36 |                           |                                                                   |                  |
| 37 | Recruitment               | <a href="#">#15</a> Strategies for achieving adequate participant | 5,6              |
| 38 |                           | enrolment to reach target sample size                             |                  |
| 39 |                           |                                                                   |                  |
| 40 |                           |                                                                   |                  |
| 41 |                           |                                                                   |                  |
| 42 | <b>Methods:</b>           |                                                                   |                  |
| 43 |                           |                                                                   |                  |
| 44 | <b>Assignment of</b>      |                                                                   |                  |
| 45 | <b>interventions (for</b> |                                                                   |                  |
| 46 | <b>controlled trials)</b> |                                                                   |                  |
| 47 |                           |                                                                   |                  |
| 48 |                           |                                                                   |                  |
| 49 |                           |                                                                   |                  |
| 50 |                           |                                                                   |                  |
| 51 |                           |                                                                   |                  |
| 52 | Allocation:               | <a href="#">#16a</a> Method of generating the allocation sequence | NA – no          |
| 53 | sequence                  | (eg, computer-generated random numbers), and                      | randomization or |
| 54 | generation                | list of any factors for stratification. To reduce                 | blinding         |
| 55 |                           |                                                                   |                  |
| 56 |                           |                                                                   |                  |
| 57 |                           |                                                                   |                  |
| 58 |                           |                                                                   |                  |
| 59 |                           |                                                                   |                  |
| 60 |                           |                                                                   |                  |

1 predictability of a random sequence, details of  
 2  
 3 any planned restriction (eg, blocking) should be  
 4  
 5 provided in a separate document that is  
 6  
 7 unavailable to those who enrol participants or  
 8  
 9 assign interventions  
 10

|    |                     |                      |                                                  |
|----|---------------------|----------------------|--------------------------------------------------|
| 11 |                     |                      |                                                  |
| 12 | Allocation          | <a href="#">#16b</a> | Mechanism of implementing the allocation         |
| 13 |                     |                      |                                                  |
| 14 | concealment         |                      | sequence (eg, central telephone; sequentially    |
| 15 |                     |                      |                                                  |
| 16 | mechanism           |                      | numbered, opaque, sealed envelopes),             |
| 17 |                     |                      |                                                  |
| 18 |                     |                      | describing any steps to conceal the sequence     |
| 19 |                     |                      |                                                  |
| 20 |                     |                      | until interventions are assigned                 |
| 21 |                     |                      |                                                  |
| 22 |                     |                      |                                                  |
| 23 |                     |                      |                                                  |
| 24 | Allocation:         | <a href="#">#16c</a> | Who will generate the allocation sequence, who   |
| 25 |                     |                      |                                                  |
| 26 | implementation      |                      | will enrol participants, and who will assign     |
| 27 |                     |                      |                                                  |
| 28 |                     |                      | participants to interventions                    |
| 29 |                     |                      |                                                  |
| 30 |                     |                      |                                                  |
| 31 |                     |                      |                                                  |
| 32 | Blinding (masking)  | <a href="#">#17a</a> | Who will be blinded after assignment to          |
| 33 |                     |                      |                                                  |
| 34 |                     |                      | interventions (eg, trial participants, care      |
| 35 |                     |                      |                                                  |
| 36 |                     |                      | providers, outcome assessors, data analysts),    |
| 37 |                     |                      |                                                  |
| 38 |                     |                      | and how                                          |
| 39 |                     |                      |                                                  |
| 40 |                     |                      |                                                  |
| 41 |                     |                      |                                                  |
| 42 | Blinding (masking): | <a href="#">#17b</a> | If blinded, circumstances under which unblinding |
| 43 |                     |                      |                                                  |
| 44 | emergency           |                      | is permissible, and procedure for revealing a    |
| 45 |                     |                      |                                                  |
| 46 | unblinding          |                      | participant's allocated intervention during the  |
| 47 |                     |                      |                                                  |
| 48 |                     |                      | trial                                            |
| 49 |                     |                      |                                                  |
| 50 |                     |                      |                                                  |

51  
 52 **Methods: Data**  
 53  
 54 **collection,**  
 55  
 56  
 57 **management, and**  
 58  
 59  
 60

## analysis

|    |                      |                      |                                                         |
|----|----------------------|----------------------|---------------------------------------------------------|
| 1  |                      |                      |                                                         |
| 2  |                      |                      |                                                         |
| 3  |                      |                      |                                                         |
| 4  | Data collection plan | <a href="#">#18a</a> | Plans for assessment and collection of outcome, 5,6,7,8 |
| 5  |                      |                      |                                                         |
| 6  |                      |                      | baseline, and other trial data, including any           |
| 7  |                      |                      |                                                         |
| 8  |                      |                      | related processes to promote data quality (eg,          |
| 9  |                      |                      |                                                         |
| 10 |                      |                      | duplicate measurements, training of assessors)          |
| 11 |                      |                      |                                                         |
| 12 |                      |                      | and a description of study instruments (eg,             |
| 13 |                      |                      |                                                         |
| 14 |                      |                      | questionnaires, laboratory tests) along with their      |
| 15 |                      |                      |                                                         |
| 16 |                      |                      | reliability and validity, if known. Reference to        |
| 17 |                      |                      |                                                         |
| 18 |                      |                      | where data collection forms can be found, if not        |
| 19 |                      |                      |                                                         |
| 20 |                      |                      | in the protocol                                         |
| 21 |                      |                      |                                                         |
| 22 |                      |                      |                                                         |
| 23 |                      |                      |                                                         |
| 24 |                      |                      |                                                         |
| 25 | Data collection      | <a href="#">#18b</a> | Plans to promote participant retention and NA           |
| 26 |                      |                      |                                                         |
| 27 | plan: retention      |                      | complete follow-up, including list of any outcome       |
| 28 |                      |                      |                                                         |
| 29 |                      |                      | data to be collected for participants who               |
| 30 |                      |                      |                                                         |
| 31 |                      |                      | discontinue or deviate from intervention                |
| 32 |                      |                      |                                                         |
| 33 |                      |                      | protocols                                               |
| 34 |                      |                      |                                                         |
| 35 |                      |                      |                                                         |
| 36 |                      |                      |                                                         |
| 37 | Data management      | <a href="#">#19</a>  | Plans for data entry, coding, security, and 6,7,8       |
| 38 |                      |                      |                                                         |
| 39 |                      |                      | storage, including any related processes to             |
| 40 |                      |                      |                                                         |
| 41 |                      |                      | promote data quality (eg, double data entry;            |
| 42 |                      |                      |                                                         |
| 43 |                      |                      | range checks for data values). Reference to             |
| 44 |                      |                      |                                                         |
| 45 |                      |                      | where details of data management procedures             |
| 46 |                      |                      |                                                         |
| 47 |                      |                      | can be found, if not in the protocol                    |
| 48 |                      |                      |                                                         |
| 49 |                      |                      |                                                         |
| 50 |                      |                      |                                                         |
| 51 | Statistics: outcomes | <a href="#">#20a</a> | Statistical methods for analysing primary and 9,10      |
| 52 |                      |                      |                                                         |
| 53 |                      |                      | secondary outcomes. Reference to where other            |
| 54 |                      |                      |                                                         |
| 55 |                      |                      | details of the statistical analysis plan can be         |
| 56 |                      |                      |                                                         |
| 57 |                      |                      | found, if not in the protocol                           |
| 58 |                      |                      |                                                         |
| 59 |                      |                      |                                                         |
| 60 |                      |                      |                                                         |

|    |                        |                      |                                                   |                |
|----|------------------------|----------------------|---------------------------------------------------|----------------|
| 1  | Statistics: additional | <a href="#">#20b</a> | Methods for any additional analyses (eg,          | 9,10           |
| 2  |                        |                      |                                                   |                |
| 3  | analyses               |                      | subgroup and adjusted analyses)                   |                |
| 4  |                        |                      |                                                   |                |
| 5  |                        |                      |                                                   |                |
| 6  | Statistics: analysis   | <a href="#">#20c</a> | Definition of analysis population relating to     | 9,10           |
| 7  |                        |                      |                                                   |                |
| 8  | population and         |                      | protocol non-adherence (eg, as randomised         |                |
| 9  |                        |                      |                                                   |                |
| 10 | missing data           |                      | analysis), and any statistical methods to handle  |                |
| 11 |                        |                      |                                                   |                |
| 12 |                        |                      | missing data (eg, multiple imputation)            |                |
| 13 |                        |                      |                                                   |                |
| 14 |                        |                      |                                                   |                |
| 15 |                        |                      |                                                   |                |
| 16 | <b>Methods:</b>        |                      |                                                   |                |
| 17 |                        |                      |                                                   |                |
| 18 | <b>Monitoring</b>      |                      |                                                   |                |
| 19 |                        |                      |                                                   |                |
| 20 |                        |                      |                                                   |                |
| 21 |                        |                      |                                                   |                |
| 22 | Data monitoring:       | <a href="#">#21a</a> | Composition of data monitoring committee          | NA – no DMC    |
| 23 |                        |                      |                                                   |                |
| 24 | formal committee       |                      | (DMC); summary of its role and reporting          |                |
| 25 |                        |                      |                                                   |                |
| 26 |                        |                      | structure; statement of whether it is independent |                |
| 27 |                        |                      |                                                   |                |
| 28 |                        |                      | from the sponsor and competing interests; and     |                |
| 29 |                        |                      |                                                   |                |
| 30 |                        |                      | reference to where further details about its      |                |
| 31 |                        |                      |                                                   |                |
| 32 |                        |                      | charter can be found, if not in the protocol.     |                |
| 33 |                        |                      |                                                   |                |
| 34 |                        |                      | Alternatively, an explanation of why a DMC is     |                |
| 35 |                        |                      |                                                   |                |
| 36 |                        |                      | not needed                                        |                |
| 37 |                        |                      |                                                   |                |
| 38 |                        |                      |                                                   |                |
| 39 |                        |                      |                                                   |                |
| 40 |                        |                      |                                                   |                |
| 41 | Data monitoring:       | <a href="#">#21b</a> | Description of any interim analyses and stopping  | NA- no interim |
| 42 |                        |                      |                                                   |                |
| 43 | interim analysis       |                      | guidelines, including who will have access to     | analyses       |
| 44 |                        |                      |                                                   |                |
| 45 |                        |                      | these interim results and make the final decision |                |
| 46 |                        |                      |                                                   |                |
| 47 |                        |                      | to terminate the trial                            |                |
| 48 |                        |                      |                                                   |                |
| 49 |                        |                      |                                                   |                |
| 50 |                        |                      |                                                   |                |
| 51 | Harms                  | <a href="#">#22</a>  | Plans for collecting, assessing, reporting, and   | 8              |
| 52 |                        |                      |                                                   |                |
| 53 |                        |                      | managing solicited and spontaneously reported     |                |
| 54 |                        |                      |                                                   |                |
| 55 |                        |                      | adverse events and other unintended effects of    |                |
| 56 |                        |                      |                                                   |                |
| 57 |                        |                      | trial interventions or trial conduct              |                |
| 58 |                        |                      |                                                   |                |
| 59 |                        |                      |                                                   |                |
| 60 |                        |                      |                                                   |                |

|    |                      |                      |                                                      |     |
|----|----------------------|----------------------|------------------------------------------------------|-----|
| 1  | Auditing             | <a href="#">#23</a>  | Frequency and procedures for auditing trial          | NA  |
| 2  |                      |                      |                                                      |     |
| 3  |                      |                      |                                                      |     |
| 4  |                      |                      | conduct, if any, and whether the process will be     |     |
| 5  |                      |                      |                                                      |     |
| 6  |                      |                      | independent from investigators and the sponsor       |     |
| 7  |                      |                      |                                                      |     |
| 8  |                      |                      |                                                      |     |
| 9  | <b>Ethics and</b>    |                      |                                                      |     |
| 10 |                      |                      |                                                      |     |
| 11 | <b>dissemination</b> |                      |                                                      |     |
| 12 |                      |                      |                                                      |     |
| 13 |                      |                      |                                                      |     |
| 14 | Research ethics      | <a href="#">#24</a>  | Plans for seeking research ethics committee /        | 10  |
| 15 |                      |                      |                                                      |     |
| 16 | approval             |                      | institutional review board (REC / IRB) approval      |     |
| 17 |                      |                      |                                                      |     |
| 18 |                      |                      |                                                      |     |
| 19 | Protocol             | <a href="#">#25</a>  | Plans for communicating important protocol           | NA  |
| 20 |                      |                      |                                                      |     |
| 21 | amendments           |                      | modifications (eg, changes to eligibility criteria,  |     |
| 22 |                      |                      | outcomes, analyses) to relevant parties (eg,         |     |
| 23 |                      |                      |                                                      |     |
| 24 |                      |                      | investigators, REC / IRBs, trial participants, trial |     |
| 25 |                      |                      |                                                      |     |
| 26 |                      |                      | registries, journals, regulators)                    |     |
| 27 |                      |                      |                                                      |     |
| 28 |                      |                      |                                                      |     |
| 29 |                      |                      |                                                      |     |
| 30 |                      |                      |                                                      |     |
| 31 | Consent or assent    | <a href="#">#26a</a> | Who will obtain informed consent or assent from      | 5,6 |
| 32 |                      |                      |                                                      |     |
| 33 |                      |                      | potential trial participants or authorised           |     |
| 34 |                      |                      |                                                      |     |
| 35 |                      |                      | surrogates, and how (see Item 32)                    |     |
| 36 |                      |                      |                                                      |     |
| 37 |                      |                      |                                                      |     |
| 38 |                      |                      |                                                      |     |
| 39 | Consent or assent:   | <a href="#">#26b</a> | Additional consent provisions for collection and     | NA  |
| 40 |                      |                      |                                                      |     |
| 41 | ancillary studies    |                      | use of participant data and biological specimens     |     |
| 42 |                      |                      |                                                      |     |
| 43 |                      |                      | in ancillary studies, if applicable                  |     |
| 44 |                      |                      |                                                      |     |
| 45 |                      |                      |                                                      |     |
| 46 |                      |                      |                                                      |     |
| 47 | Confidentiality      | <a href="#">#27</a>  | How personal information about potential and         | 8   |
| 48 |                      |                      |                                                      |     |
| 49 |                      |                      | enrolled participants will be collected, shared,     |     |
| 50 |                      |                      |                                                      |     |
| 51 |                      |                      | and maintained in order to protect confidentiality   |     |
| 52 |                      |                      |                                                      |     |
| 53 |                      |                      | before, during, and after the trial                  |     |
| 54 |                      |                      |                                                      |     |
| 55 |                      |                      |                                                      |     |
| 56 |                      |                      |                                                      |     |
| 57 | Declaration of       | <a href="#">#28</a>  | Financial and other competing interests for          | 11  |
| 58 |                      |                      |                                                      |     |
| 59 |                      |                      |                                                      |     |
| 60 |                      |                      |                                                      |     |



|    |                       |                      |                                                    |      |
|----|-----------------------|----------------------|----------------------------------------------------|------|
| 1  | interests             |                      | principal investigators for the overall trial and  |      |
| 2  |                       |                      | each study site                                    |      |
| 3  |                       |                      |                                                    |      |
| 4  |                       |                      |                                                    |      |
| 5  |                       |                      |                                                    |      |
| 6  | Data access           | <a href="#">#29</a>  | Statement of who will have access to the final     | 11   |
| 7  |                       |                      | trial dataset, and disclosure of contractual       |      |
| 8  |                       |                      | agreements that limit such access for              |      |
| 9  |                       |                      | investigators                                      |      |
| 10 |                       |                      |                                                    |      |
| 11 |                       |                      |                                                    |      |
| 12 |                       |                      |                                                    |      |
| 13 |                       |                      |                                                    |      |
| 14 |                       |                      |                                                    |      |
| 15 | Ancillary and post    | <a href="#">#30</a>  | Provisions, if any, for ancillary and post-trial   | NA   |
| 16 | trial care            |                      | care, and for compensation to those who suffer     |      |
| 17 |                       |                      | harm from trial participation                      |      |
| 18 |                       |                      |                                                    |      |
| 19 |                       |                      |                                                    |      |
| 20 |                       |                      |                                                    |      |
| 21 |                       |                      |                                                    |      |
| 22 |                       |                      |                                                    |      |
| 23 | Dissemination         | <a href="#">#31a</a> | Plans for investigators and sponsor to             | 11   |
| 24 | policy: trial results |                      | communicate trial results to participants,         |      |
| 25 |                       |                      | healthcare professionals, the public, and other    |      |
| 26 |                       |                      | relevant groups (eg, via publication, reporting in |      |
| 27 |                       |                      | results databases, or other data sharing           |      |
| 28 |                       |                      | arrangements), including any publication           |      |
| 29 |                       |                      | restrictions                                       |      |
| 30 |                       |                      |                                                    |      |
| 31 |                       |                      |                                                    |      |
| 32 |                       |                      |                                                    |      |
| 33 |                       |                      |                                                    |      |
| 34 |                       |                      |                                                    |      |
| 35 |                       |                      |                                                    |      |
| 36 |                       |                      |                                                    |      |
| 37 |                       |                      |                                                    |      |
| 38 |                       |                      |                                                    |      |
| 39 |                       |                      |                                                    |      |
| 40 | Dissemination         | <a href="#">#31b</a> | Authorship eligibility guidelines and any          | 12   |
| 41 | policy: authorship    |                      | intended use of professional writers               |      |
| 42 |                       |                      |                                                    |      |
| 43 |                       |                      |                                                    |      |
| 44 |                       |                      |                                                    |      |
| 45 | Dissemination         | <a href="#">#31c</a> | Plans, if any, for granting public access to the   | 11   |
| 46 | policy: reproducible  |                      | full protocol, participant-level dataset, and      |      |
| 47 | research              |                      | statistical code                                   |      |
| 48 |                       |                      |                                                    |      |
| 49 |                       |                      |                                                    |      |
| 50 |                       |                      |                                                    |      |
| 51 |                       |                      |                                                    |      |
| 52 |                       |                      |                                                    |      |
| 53 | <b>Appendices</b>     |                      |                                                    |      |
| 54 |                       |                      |                                                    |      |
| 55 |                       |                      |                                                    |      |
| 56 | Informed consent      | <a href="#">#32</a>  | Model consent form and other related               | Supp |
| 57 |                       |                      |                                                    |      |
| 58 |                       |                      |                                                    |      |
| 59 |                       |                      |                                                    |      |
| 60 |                       |                      |                                                    |      |

|    |            |                                                                      |         |
|----|------------|----------------------------------------------------------------------|---------|
| 1  | materials  | documentation given to participants and                              |         |
| 2  |            | authorised surrogates                                                |         |
| 3  |            |                                                                      |         |
| 4  |            |                                                                      |         |
| 5  |            |                                                                      |         |
| 6  | Biological | <a href="#">#33</a> Plans for collection, laboratory evaluation, and | 6.7,8,9 |
| 7  |            |                                                                      |         |
| 8  | specimens  | storage of biological specimens for genetic or                       |         |
| 9  |            | molecular analysis in the current trial and for                      |         |
| 10 |            | future use in ancillary studies, if applicable                       |         |
| 11 |            |                                                                      |         |
| 12 |            |                                                                      |         |
| 13 |            |                                                                      |         |
| 14 |            |                                                                      |         |
| 15 |            |                                                                      |         |

16 None The SPIRIT Explanation and Elaboration paper is distributed under the terms of the Creative  
17 Commons Attribution License CC-BY-NC. This checklist can be completed online using  
18 <https://www.goodreports.org/>, a tool made by the [EQUATOR Network](#) in collaboration with  
19 [Penelope.ai](#)  
20  
21  
22  
23  
24  
25  
26  
27  
28  
29  
30  
31  
32  
33  
34  
35  
36  
37  
38  
39  
40  
41  
42  
43  
44  
45  
46  
47  
48  
49  
50  
51  
52  
53  
54  
55  
56  
57  
58  
59  
60
